# Supplementary material for: Diterpenoids with a novel 6/5-5 spiro tricyclic skeleton from Orthosiphon wulfenioides and their NLRP3 inflammasome inhibitory activity
Source: Royal Society of Chemistry journal article supplement (doi:10.1039/d3qo00247k), 2023-01-01
Supplement: d3qo00247k1.pdf [file d3qo00247k1.pdf]

## **Supporting Information**

### **Diterpenoids with novel 6/5-5 spiro tricyclic skeleton from *Orthosiphon wulfenioides* and their NLRP3 inflammasome inhibitory activity**

Wen-Chao Tu,<sup>‡a,b</sup> Xing-Jie Zhang,<sup>‡a</sup> Ying-Xin Zhao,<sup>‡a</sup> Wei-Chi Chen,<sup>b</sup> Xing-Yu Zhang,<sup>b</sup> Chang-Lin Yang,<sup>b</sup> Muhammad Aurang Zeb,<sup>a</sup> Xiao-Li Li,<sup>\*a</sup> Kaunda-Joseph Sakah,<sup>a</sup> Rui-Han Zhang,<sup>a</sup> Mei-Feng Liu,<sup>\*b</sup> Wei-Lie Xiao<sup>\*a</sup>

<sup>a</sup>Key Laboratory of Medicinal Chemistry for Natural Resource, Ministry of Education, Yunnan Characteristic Plant Extraction Laboratory, Yunnan Provincial Center for Research & Development of Natural Products, State Key Laboratory for Conservation and Utilization of Bio-Resources in Yunnan, School of Pharmacy and School of Chemical Science and Technology, Yunnan University, Kunming, 650091, PR China

<sup>b</sup>Key Laboratory of Functional Molecular Engineering of Guangdong Province, School of Chemistry and Chemical Engineering, South China University of Technology, Guangzhou, 510640, China

<sup>‡</sup>These authors contributed equally.

#### **Corresponding Author**

Xiao-Li Li\*: E-mail: [lixiaoli@ynu.edu.cn](mailto:lixiaoli@ynu.edu.cn)

Mei-Feng Liu\*: E-mail: [liumf@scut.edu.cn](mailto:liumf@scut.edu.cn)

Wei-Lie Xiao\*: E-mail: [xiaoweilie@ynu.edu.cn](mailto:xiaoweilie@ynu.edu.cn)

## Contents

|                                                                                                                                                                                      |    |
|--------------------------------------------------------------------------------------------------------------------------------------------------------------------------------------|----|
| <b>Figure S1.</b> Possible isomers <b>1A</b> and <b>1B</b> for compound <b>1</b> .....                                                                                               | 4  |
| <b>Figure S2.</b> Conformers of isomer <b>1A</b> .....                                                                                                                               | 4  |
| <b>Table S1.</b> Important thermodynamic parameters and Boltzmann distributions of the optimized isomer <b>1A</b> at B3LYP/6-31+ G (d, p) level in gas phase.....                    | 4  |
| <b>Table S2.</b> Optimized Z-matrixes of isomer <b>1A</b> in the gas phase (Å) at B3LYP/6-31+ G (d, p) level. ....                                                                   | 4  |
| <b>Figure S3.</b> Conformers of isomer <b>1B</b> .....                                                                                                                               | 6  |
| <b>Table S3.</b> Important thermodynamic parameters and Boltzmann distributions of the optimized isomer <b>1B</b> at B3LYP/6-31+ G (d, p) level in gas phase.....                    | 6  |
| <b>Table S4.</b> Optimized Z-matrixes of isomer <b>1B</b> in the gas phase (Å) at B3LYP/6-31+ G (d, p) level. ....                                                                   | 6  |
| <b>Table S5.</b> Experimental and calculated <sup>13</sup> C NMR data for compound <b>1A</b> ( $\Delta$ in ppm) .....                                                                | 7  |
| <b>Table S6.</b> Experimental and calculated <sup>13</sup> C NMR data for compound <b>1B</b> ( $\Delta$ in ppm) .....                                                                | 8  |
| <b>Table S7.</b> Experimental chemical shifts of compound <b>1</b> , calculated shielding tensors and chemical shifts of isomer <b>1</b> in gas phase with TMS as reference.....     | 9  |
| <b>Table S8.</b> Experimental chemical shifts of compound <b>1</b> , calculated shielding tensors and chemical shifts of isomer <b>1</b> in chloroform with TMS as reference.....    | 10 |
| <b>Figure. S4.</b> Detailed DP4+ probability of compound <b>1</b> (calculated at mPW1PW91/6-31G (d, p) level in gas with PCM model. ....                                             | 11 |
| <b>Figure. S5.</b> Detailed DP4+ probability of compound <b>1</b> (calculated at mPW1PW91/6-31G (d, p) level in chloroform with PCM model.....                                       | 12 |
| <b>Figure S6.</b> Possible conformers of <b>2</b> for ECD calculation.....                                                                                                           | 12 |
| <b>Table S9.</b> Important thermodynamic parameters and Boltzmann distributions of the optimized isomer <b>2</b> at B3LYP/6-31 + G (d, p) level in the gas phase. ....               | 12 |
| <b>Table S10.</b> Optimized Z-matrixes of compound <b>2</b> in the gas phase (Å) at B3LYP/6-31+ G (d, p) level.....                                                                  | 12 |
| <b>Table S11.</b> Key transitions, oscillator strengths, and rotatory strengths in the ECD spectra of conformers <b>2A</b> at the B3LYP/6-31 + G (d, p) level in MeOH with PCM. .... | 14 |
| <b>Figure S7-12.</b> NMR spectrum of wulfenioidin <b>A</b> ( <b>1</b> ) in chloroform (600 MHz).....                                                                                 | 17 |
| <b>Figure S13.</b> HRESIMS spectrum of wulfenioidin <b>A</b> ( <b>1</b> ) .....                                                                                                      | 23 |
| <b>Figure S14.</b> IR spectrum of wulfenioidin <b>A</b> ( <b>1</b> ) .....                                                                                                           | 24 |
| <b>Figure S15.</b> UV spectrum of wulfenioidin <b>A</b> ( <b>1</b> ) .....                                                                                                           | 25 |
| <b>Figure S16.</b> CD spectrum of wulfenioidin <b>A</b> ( <b>1</b> ).....                                                                                                            | 26 |
| <b>Figure S17.</b> OR report of wulfenioidin <b>A</b> ( <b>1</b> ).....                                                                                                              | 27 |
| <b>Figure S18-23.</b> NMR spectrum of wulfenioidin <b>B</b> ( <b>2</b> ) in chloroform (400 MHz).....                                                                                | 28 |
| <b>Figure S24.</b> HRESIMS spectrum of wulfenioidin <b>B</b> ( <b>2</b> ) .....                                                                                                      | 34 |
| <b>Figure S25.</b> IR spectrum of wulfenioidin <b>B</b> ( <b>2</b> ).....                                                                                                            | 35 |
| <b>Figure S26.</b> UV spectrum of wulfenioidin <b>B</b> ( <b>2</b> ).....                                                                                                            | 36 |
| <b>Figure S27.</b> CD spectrum of wulfenioidin <b>B</b> ( <b>2</b> ).....                                                                                                            | 37 |
| <b>Figure S28.</b> OR report of wulfenioidin <b>B</b> ( <b>2</b> ).....                                                                                                              | 38 |
| <b>Figure S29-34.</b> NMR spectrum of wulfenioidin <b>C</b> ( <b>3</b> ) in chloroform (600 MHz) .....                                                                               | 39 |
| <b>Figure S35.</b> HRESIMS spectrum of wulfenioidin <b>C</b> ( <b>3</b> ) .....                                                                                                      | 45 |

|                                                                                                |    |
|------------------------------------------------------------------------------------------------|----|
| <b>Figure S36.</b> IR spectrum of wulfenoidin <b>C (3)</b> .....                               | 46 |
| <b>Figure S37.</b> UV spectrum of wulfenoidin <b>C (3)</b> .....                               | 47 |
| <b>Figure S38.</b> CD spectrum of wulfenoidin <b>C (3)</b> .....                               | 48 |
| <b>Figure S39.</b> OR report of wulfenoidin <b>C (3)</b> .....                                 | 49 |
| <b>Figure S40.</b> The full raw data of western blots (E, F, and G) of compound <b>3</b> ..... | 50 |

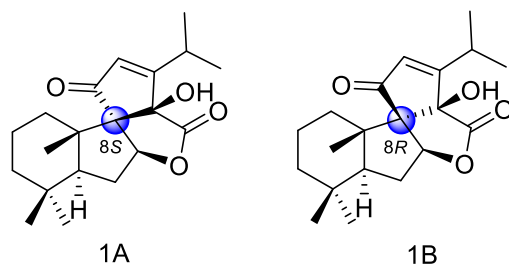

**Figure S1.** Possible isomers **1A** and **1B** for compound **1**

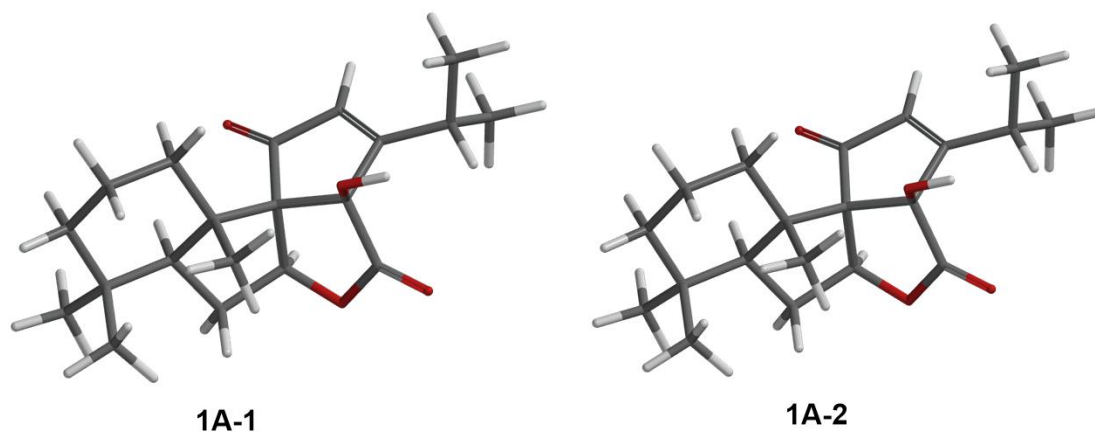

**Figure S2.** Conformers of isomer **1A**

**Table S1.** Important thermodynamic parameters and Boltzmann distributions of the optimized isomer **1A** at B3LYP/6-31+ G (d, p) level in gas phase.

| Conformations | Energy (a.u) | $\Delta G(\text{kcal/mol})$ | %    | Number of imaginary frequencies |
|---------------|--------------|-----------------------------|------|---------------------------------|
| 1A-1          | -1079.680290 | 0                           | 50.1 | 0                               |
| 1A-2          | -1079.680288 | 0                           | 49.9 | 0                               |

**Table S2.** Optimized Z-matrixes of isomer **1A** in the gas phase ( $\text{\AA}$ ) at B3LYP/6-31+ G (d, p) level.

| <b>1A-1</b> |          |          |          | <b>1A-2</b> |          |          |          |
|-------------|----------|----------|----------|-------------|----------|----------|----------|
| C           | 3.08277  | -1.34019 | 1.711662 | C           | 3.082751 | -1.34016 | 1.711686 |
| C           | 3.943443 | -1.15487 | 0.451776 | C           | 3.943332 | -1.15496 | 0.451738 |
| C           | 2.071615 | 0.064263 | -0.62393 | C           | 2.071564 | 0.064246 | -0.62392 |
| C           | 1.148694 | -0.12049 | 0.619327 | C           | 1.148676 | -0.12037 | 0.619367 |
| C           | 1.576795 | -1.38151 | 1.390263 | C           | 1.57674  | -1.38135 | 1.390416 |
| C           | 3.599601 | 0.102223 | -0.3908  | C           | 3.599547 | 0.102143 | -0.39085 |
| C           | 4.137176 | 1.379703 | 0.283026 | C           | 4.137146 | 1.379646 | 0.282868 |
| C           | 4.298205 | -0.02238 | -1.76013 | C           | 4.298149 | -0.02254 | -1.76017 |
| C           | 1.160514 | 1.091317 | 1.579178 | C           | 1.160394 | 1.091557 | 1.579101 |
| C           | 1.387983 | 1.185575 | -1.424   | C           | 1.387957 | 1.18558  | -1.42399 |
| C           | -0.1029  | 0.850598 | -1.27195 | C           | -0.10292 | 0.850566 | -1.27198 |
| C           | -0.23034 | -0.20639 | -0.11181 | C           | -0.23033 | -0.20637 | -0.11175 |
| C           | -1.5368  | 0.241331 | 0.572235 | C           | -1.53678 | 0.241376 | 0.57223  |

|   |          |          |          |   |          |          |          |
|---|----------|----------|----------|---|----------|----------|----------|
| C | -1.64475 | 1.722524 | 0.217976 | C | -1.64462 | 1.72255  | 0.217999 |
| O | -2.29291 | 2.537135 | 0.83626  | O | -2.29255 | 2.537196 | 0.83651  |
| O | -0.89821 | 2.008293 | -0.86044 | O | -0.8983  | 2.008255 | -0.86055 |
| O | -1.63113 | 0.057223 | 1.973824 | O | -1.63106 | 0.057401 | 1.973851 |
| C | -2.63163 | -0.6156  | -0.08375 | C | -2.63161 | -0.61553 | -0.08382 |
| C | -2.08269 | -1.64194 | -0.75685 | C | -2.08265 | -1.64192 | -0.75684 |
| C | -0.6144  | -1.54901 | -0.77366 | C | -0.61434 | -1.54903 | -0.77353 |
| O | 0.148337 | -2.34486 | -1.29727 | O | 0.148447 | -2.34498 | -1.29691 |
| C | -4.08521 | -0.29571 | 0.118714 | C | -4.08519 | -0.29561 | 0.11853  |
| C | -4.59486 | 0.585461 | -1.04447 | C | -4.59491 | 0.585024 | -1.04502 |
| C | -4.9453  | -1.55833 | 0.269765 | C | -4.94522 | -1.55823 | 0.270136 |
| H | 1.919844 | -0.85406 | -1.20347 | H | 1.919703 | -0.85409 | -1.20344 |
| H | 3.297961 | -0.54501 | 2.434945 | H | 3.298084 | -0.54497 | 2.434913 |
| H | 3.368423 | -2.27655 | 2.204675 | H | 3.368356 | -2.27652 | 2.204732 |
| H | 5.00603  | -1.12291 | 0.72491  | H | 5.005949 | -1.12312 | 0.724772 |
| H | 3.811383 | -2.03784 | -0.18841 | H | 3.811112 | -2.03792 | -0.18843 |
| H | 0.990251 | -1.47651 | 2.311136 | H | 0.990256 | -1.47617 | 2.311342 |
| H | 1.37845  | -2.26773 | 0.781108 | H | 1.378258 | -2.26763 | 0.78138  |
| H | 3.75745  | 2.28333  | -0.20516 | H | 3.758245 | 2.283185 | -0.20613 |
| H | 5.229846 | 1.400206 | 0.204623 | H | 5.229892 | 1.399599 | 0.205375 |
| H | 3.89038  | 1.445275 | 1.342866 | H | 3.889431 | 1.445887 | 1.34244  |
| H | 3.918271 | -0.8822  | -2.32287 | H | 3.918331 | -0.88248 | -2.3228  |
| H | 4.149121 | 0.876203 | -2.36899 | H | 4.14894  | 0.875941 | -2.36915 |
| H | 5.377749 | -0.15601 | -1.62767 | H | 5.377714 | -0.15601 | -1.62771 |
| H | 2.124435 | 1.187779 | 2.072654 | H | 2.124101 | 1.187713 | 2.073064 |
| H | 0.962987 | 2.041396 | 1.077386 | H | 0.963427 | 2.041643 | 1.077108 |
| H | 0.410472 | 0.952661 | 2.356761 | H | 0.409902 | 0.953212 | 2.3563   |
| H | 1.686375 | 1.204352 | -2.4745  | H | 1.686364 | 1.20435  | -2.47448 |
| H | 1.582587 | 2.176688 | -1.00586 | H | 1.582575 | 2.176697 | -1.00585 |
| H | -0.5493  | 0.500268 | -2.20534 | H | -0.54927 | 0.500167 | -2.20537 |
| H | -2.07353 | 0.845594 | 2.331722 | H | -2.07472 | 0.845284 | 2.331311 |
| H | -2.60558 | -2.45202 | -1.25048 | H | -2.60552 | -2.45202 | -1.25046 |
| H | -4.16873 | 0.291749 | 1.040566 | H | -4.16878 | 0.292238 | 1.040127 |
| H | -5.63734 | 0.867387 | -0.86615 | H | -5.63735 | 0.867111 | -0.86676 |
| H | -4.01399 | 1.505554 | -1.14673 | H | -4.01398 | 1.50503  | -1.14778 |
| H | -4.5431  | 0.035374 | -1.98991 | H | -4.54325 | 0.034505 | -1.99022 |
| H | -5.98375 | -1.28262 | 0.47789  | H | -5.98366 | -1.28249 | 0.478226 |
| H | -4.58407 | -2.18718 | 1.088595 | H | -4.58387 | -2.18672 | 1.08919  |
| H | -4.93883 | -2.15496 | -0.64876 | H | -4.93876 | -2.15521 | -0.64815 |

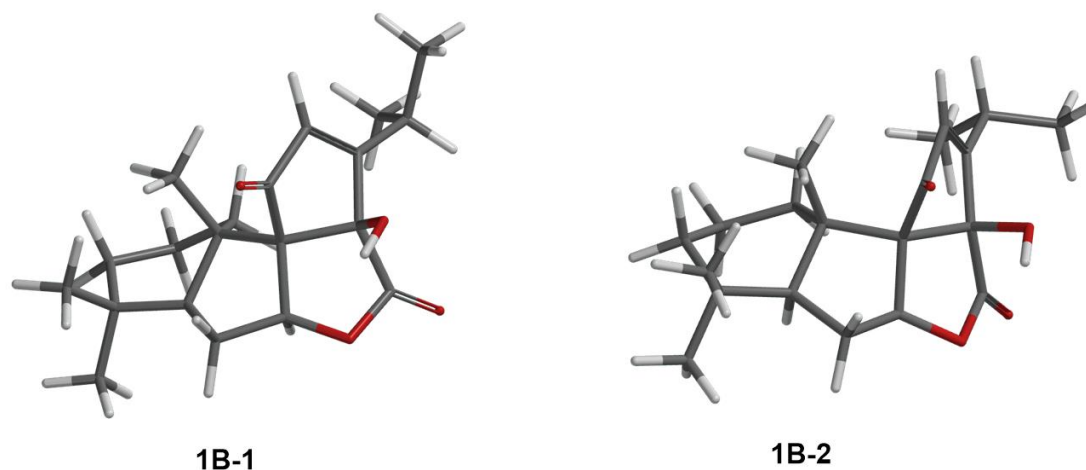

**Figure S3.** Conformers of isomer **1B**

**Table S3.** Important thermodynamic parameters and Boltzmann distributions of the optimized isomer **1B** at B3LYP/6-31+ G (d, p) level in gas phase.

| Conformations | Energy (a.u) | $\Delta G$ (kcal/mol) | %    | Number of imaginary frequencies |
|---------------|--------------|-----------------------|------|---------------------------------|
| 1B-1          | -1079.513778 | 0                     | 41.0 | 0                               |
| 1B-2          | -1079.51412  | -0.21                 | 59.0 | 0                               |

**Table S4.** Optimized Z-matrixes of isomer **1B** in the gas phase ( $\text{\AA}$ ) at B3LYP/6-31+ G (d, p) level.

| <b>1B-1</b> |          |          |          | <b>1B-2</b> |          |          |          |
|-------------|----------|----------|----------|-------------|----------|----------|----------|
| C           | 2.178301 | -1.72619 | -1.80749 | C           | -2.30866 | 2.071928 | -1.3265  |
| C           | 3.373828 | -1.6275  | -0.81725 | C           | -3.51872 | 1.613477 | -0.46309 |
| C           | 2.117778 | 0.404761 | -0.18025 | C           | -2.10725 | -0.41198 | -0.33671 |
| C           | 0.858735 | -0.55866 | 0.054363 | C           | -0.94477 | 0.543972 | 0.215007 |
| C           | 0.751782 | -1.35591 | -1.26027 | C           | -0.871   | 1.676516 | -0.82794 |
| C           | 3.503377 | -0.25653 | -0.05329 | C           | -3.54866 | 0.079972 | -0.10583 |
| C           | 4.51521  | 0.633439 | -0.80724 | C           | -4.45729 | -0.64489 | -1.1223  |
| C           | 4.033138 | -0.4419  | 1.377349 | C           | -4.1317  | -0.17455 | 1.293105 |
| C           | 1.037592 | -1.59814 | 1.183397 | C           | -1.24623 | 1.219459 | 1.571509 |
| C           | 1.752962 | 1.841208 | 0.335893 | C           | -1.63205 | -1.90253 | -0.2138  |
| C           | 0.350916 | 1.732729 | -0.24615 | C           | -0.22909 | -1.52983 | -0.67055 |
| C           | -0.29698 | 0.534043 | 0.428461 | C           | 0.290114 | -0.5186  | 0.339123 |
| C           | -1.77751 | 0.800818 | 0.013916 | C           | 1.80189  | -0.55013 | -0.04909 |
| C           | -1.70712 | 1.853966 | -1.08814 | C           | 1.859632 | -1.26135 | -1.39816 |
| O           | -2.35264 | 2.074017 | -2.06953 | O           | 2.557319 | -1.15676 | -2.36313 |
| O           | -0.68401 | 2.718918 | -0.60525 | O           | 0.89872  | -2.29722 | -1.22855 |
| O           | -2.35445 | 1.71184  | 1.043064 | O           | 2.417742 | -1.66625 | 0.724337 |
| C           | -2.47622 | -0.49074 | 0.384988 | C           | 2.370531 | 0.63836  | 0.701061 |
| C           | -1.89962 | -0.79815 | 1.571399 | C           | 1.730642 | 0.559163 | 1.89116  |
| C           | -0.74634 | 0.147809 | 1.878259 | C           | 0.654931 | -0.5179  | 1.86344  |

|   |          |          |          |   |          |          |          |
|---|----------|----------|----------|---|----------|----------|----------|
| O | -0.28512 | 0.432022 | 2.960555 | O | 0.182636 | -1.12525 | 2.79774  |
| C | -3.63173 | -1.09677 | -0.34529 | C | 3.493059 | 1.515764 | 0.250703 |
| C | -3.21407 | -1.45921 | -1.78602 | C | 4.763245 | 0.684537 | -0.01657 |
| C | -4.22665 | -2.30035 | 0.391057 | C | 3.080716 | 2.304939 | -1.00794 |
| H | 2.155508 | -2.74358 | -2.21143 | H | -2.36401 | 3.159806 | -1.43708 |
| H | 2.397264 | -1.07878 | -2.66412 | H | -2.44531 | 1.670455 | -2.33695 |
| H | 4.291467 | -1.79702 | -1.39276 | H | -4.43073 | 1.862796 | -1.0181  |
| H | 3.332021 | -2.44943 | -0.09861 | H | -3.57053 | 2.207864 | 0.45225  |
| H | 2.100586 | 0.575046 | -1.25961 | H | -2.04486 | -0.27641 | -1.41928 |
| H | 0.152526 | -2.25798 | -1.09732 | H | -0.35896 | 2.543108 | -0.39659 |
| H | 0.229149 | -0.7701  | -2.02624 | H | -0.27732 | 1.365326 | -1.69612 |
| H | 4.59831  | 1.624049 | -0.34784 | H | -4.46644 | -1.72663 | -0.95205 |
| H | 5.509933 | 0.175625 | -0.79164 | H | -5.48823 | -0.28613 | -1.03415 |
| H | 4.225179 | 0.770138 | -1.85554 | H | -4.12725 | -0.46746 | -2.1525  |
| H | 3.407157 | -1.09228 | 1.986612 | H | -3.58209 | 0.33035  | 2.086226 |
| H | 5.037829 | -0.87918 | 1.349726 | H | -5.16969 | 0.175151 | 1.334221 |
| H | 4.108165 | 0.525153 | 1.886829 | H | -4.13565 | -1.24689 | 1.517648 |
| H | 1.790424 | -2.33162 | 0.911888 | H | -2.05224 | 1.939453 | 1.46892  |
| H | 1.314787 | -1.16241 | 2.140566 | H | -1.51174 | 0.519801 | 2.360636 |
| H | 0.107742 | -2.15627 | 1.318999 | H | -0.37269 | 1.788696 | 1.899414 |
| H | 2.384315 | 2.60383  | -0.12414 | H | -2.18032 | -2.55438 | -0.89666 |
| H | 1.754505 | 1.948296 | 1.423289 | H | -1.65508 | -2.3058  | 0.801438 |
| H | 0.539984 | 1.358784 | -1.25675 | H | -0.42014 | -0.90754 | -1.5497  |
| H | -1.91646 | 2.577317 | 0.978755 | H | 2.05346  | -2.50897 | 0.404732 |
| H | -2.21304 | -1.56307 | 2.271768 | H | 1.956177 | 1.12773  | 2.786814 |
| H | -4.39823 | -0.3105  | -0.41736 | H | 3.698469 | 2.227468 | 1.060186 |
| H | -4.07372 | -1.85088 | -2.33854 | H | 5.586089 | 1.346778 | -0.30492 |
| H | -2.83883 | -0.58434 | -2.32423 | H | 5.061202 | 0.120846 | 0.871384 |
| H | -2.43354 | -2.22773 | -1.77892 | H | 4.596525 | -0.0255  | -0.83209 |
| H | -5.08079 | -2.69995 | -0.16358 | H | 3.894004 | 2.968333 | -1.31892 |
| H | -4.5705  | -2.0274  | 1.393362 | H | 2.191109 | 2.914824 | -0.82363 |
| H | -3.48625 | -3.10256 | 0.489906 | H | 2.86883  | 1.622755 | -1.83807 |

**Table S5.** Experimental and calculated  $^{13}\text{C}$  NMR data for compound **1A** ( $\Delta$  in ppm)

| NO. | $\delta\text{e}(\text{exp})$ | 1A (gas phase)                    |                                 |                                 |                                 | 1A (PCM)                          |                                 |                                 |                                 |
|-----|------------------------------|-----------------------------------|---------------------------------|---------------------------------|---------------------------------|-----------------------------------|---------------------------------|---------------------------------|---------------------------------|
|     |                              | $\delta\text{u}(\text{unsacled})$ | $\delta\text{s}(\text{sacled})$ | $\delta\text{u}-\delta\text{e}$ | $\delta\text{s}-\delta\text{e}$ | $\delta\text{u}(\text{unsacled})$ | $\delta\text{s}(\text{sacled})$ | $\delta\text{u}-\delta\text{e}$ | $\delta\text{s}-\delta\text{e}$ |
| 1   | 31.9                         | 32.3008                           | 32.9431                         | 0.4008                          | 1.0431                          | 33.3024                           | 33.9647                         | 1.4024                          | 2.0647                          |
| 2   | 19                           | 21.9772                           | 22.4143                         | 2.9772                          | 3.4143                          | 22.4051                           | 22.8506                         | 3.4051                          | 3.8506                          |
| 3   | 40.4                         | 40.5021                           | 41.3076                         | 0.1021                          | 0.9076                          | 41.1735                           | 41.9923                         | 0.7735                          | 1.5923                          |
| 4   | 33.1                         | 36.0196                           | 36.7360                         | 2.9196                          | 3.6360                          | 36.7204                           | 37.4507                         | 3.6204                          | 4.3507                          |
| 5   | 52.6                         | 52.4447                           | 53.4877                         | -0.1553                         | 0.8877                          | 53.4415                           | 54.5043                         | 0.8415                          | 1.9043                          |
| 6   | 30.3                         | 31.7388                           | 32.3700                         | 1.4388                          | 2.0700                          | 32.2433                           | 32.8845                         | 1.9433                          | 2.5845                          |

|                                                          |       |          |          |         |         |                                                          |          |         |         |
|----------------------------------------------------------|-------|----------|----------|---------|---------|----------------------------------------------------------|----------|---------|---------|
| 7                                                        | 85.1  | 86.5693  | 88.2910  | 1.4693  | 3.1910  | 87.5816                                                  | 89.3235  | 2.4816  | 4.2235  |
| 8                                                        | 68.3  | 69.7779  | 71.1656  | 1.4779  | 2.8656  | 70.8134                                                  | 72.2217  | 2.5134  | 3.9217  |
| 9                                                        | 45.3  | 48.9450  | 49.9184  | 3.6450  | 4.6184  | 49.6829                                                  | 50.6710  | 4.3829  | 5.3710  |
| 10                                                       | 203.8 | 201.0637 | 205.0624 | -2.7363 | 1.2624  | 203.3524                                                 | 207.3966 | -0.4476 | 3.5966  |
| 11                                                       | 127.8 | 124.1684 | 126.6378 | -3.6316 | -1.1622 | 125.5617                                                 | 128.0589 | -2.2383 | 0.2589  |
| 12                                                       | 179.5 | 182.9270 | 186.5650 | 3.4270  | 7.0650  | 184.9751                                                 | 188.6539 | 5.4751  | 9.1539  |
| 13                                                       | 85.5  | 86.3601  | 88.0776  | 0.8601  | 2.5776  | 87.3040                                                  | 89.0402  | 1.8040  | 3.5402  |
| 14                                                       | 175.6 | 173.8034 | 177.2599 | -1.7966 | 1.6599  | 175.6099                                                 | 179.1024 | 0.0099  | 3.5024  |
| 15                                                       | 27.2  | 30.3813  | 30.9855  | 3.1813  | 3.7855  | 31.3402                                                  | 31.9635  | 4.1402  | 4.7635  |
| 16                                                       | 22.8  | 24.6703  | 25.1610  | 1.8703  | 2.3610  | 24.8720                                                  | 25.3666  | 2.0720  | 2.5666  |
| 17                                                       | 22.9  | 22.1259  | 22.5660  | -0.7741 | -0.3340 | 22.3783                                                  | 22.8234  | -0.5217 | -0.0766 |
| 18                                                       | 34    | 33.4670  | 34.1326  | -0.5330 | 0.1326  | 33.8242                                                  | 34.4968  | -0.1758 | 0.4968  |
| 19                                                       | 22.1  | 22.7745  | 23.2274  | 0.6745  | 1.1274  | 23.1837                                                  | 23.6448  | 1.0837  | 1.5448  |
| 20                                                       | 16.2  | 16.1710  | 16.4926  | -0.0290 | 0.2926  | 16.6784                                                  | 17.0100  | 0.4784  | 0.8100  |
| MAE = 2.07, and CMAE = 0.74 ppm. R <sup>2</sup> = 0.9990 |       |          |          |         |         | MAE = 3.00, and CMAE = 1.65 ppm. R <sup>2</sup> = 0.9989 |          |         |         |

**Table S6.** Experimental and calculated <sup>13</sup>C NMR data for compound **1B** ( $\Delta$  in ppm)

| NO.                                                      | $\delta_e(\text{exp})$ | <b>1B (gas phase)</b>       |                           |                       |                       | <b>1B (PCM)</b>                                          |                           |                       |                       |
|----------------------------------------------------------|------------------------|-----------------------------|---------------------------|-----------------------|-----------------------|----------------------------------------------------------|---------------------------|-----------------------|-----------------------|
|                                                          |                        | $\delta_u(\text{unsacled})$ | $\delta_s(\text{sacled})$ | $\delta_u - \delta_e$ | $\delta_s - \delta_e$ | $\delta_u(\text{unsacled})$                              | $\delta_s(\text{sacled})$ | $\delta_u - \delta_e$ | $\delta_s - \delta_e$ |
| 1                                                        | 31.9                   | 38.4728                     | 39.2379                   | 6.5728                | 7.3379                | 38.6888                                                  | 39.4582                   | 6.7888                | 7.5582                |
| 2                                                        | 19                     | 23.8331                     | 24.3071                   | 4.8331                | 5.3071                | 24.2430                                                  | 24.7251                   | 5.2430                | 5.7251                |
| 3                                                        | 40.4                   | 41.4318                     | 42.2558                   | 1.0318                | 1.8558                | 41.8837                                                  | 42.7166                   | 1.4837                | 2.3166                |
| 4                                                        | 33.1                   | 39.6545                     | 40.4431                   | 6.5545                | 7.3431                | 40.4373                                                  | 41.2415                   | 7.3373                | 8.1415                |
| 5                                                        | 52.6                   | 64.3267                     | 65.6060                   | 11.7267               | 13.0060               | 64.3961                                                  | 65.6768                   | 11.7961               | 13.0768               |
| 6                                                        | 30.3                   | 28.8953                     | 29.4700                   | -1.4047               | -0.8300               | 29.7344                                                  | 30.3257                   | -0.5657               | 0.0257                |
| 7                                                        | 85.1                   | 88.9202                     | 90.6886                   | 3.8202                | 5.5886                | 89.7270                                                  | 91.5115                   | 4.6270                | 6.4115                |
| 8                                                        | 68.3                   | 82.8889                     | 84.5373                   | 14.5889               | 16.2373               | 84.5926                                                  | 86.2749                   | 16.2926               | 17.9749               |
| 9                                                        | 45.3                   | 53.1488                     | 54.2058                   | 7.8488                | 8.9058                | 54.3955                                                  | 55.4773                   | 9.0955                | 10.1773               |
| 10                                                       | 203.8                  | 189.1033                    | 192.8642                  | -14.6967              | -10.9358              | 192.7415                                                 | 196.5747                  | -11.0585              | -7.2253               |
| 11                                                       | 127.8                  | 138.4043                    | 141.1569                  | 10.6043               | 13.3569               | 138.9320                                                 | 141.6951                  | 11.1320               | 13.8951               |
| 12                                                       | 179.5                  | 166.2388                    | 169.5449                  | -13.2612              | -9.9551               | 168.5058                                                 | 171.8570                  | -10.9942              | -7.6430               |
| 13                                                       | 85.5                   | 93.7152                     | 95.5790                   | 8.2152                | 10.0790               | 94.6738                                                  | 96.5566                   | 9.1738                | 11.0566               |
| 14                                                       | 175.6                  | 167.4266                    | 170.7564                  | -8.1734               | -4.8436               | 169.6705                                                 | 173.0449                  | -5.9295               | -2.5551               |
| 15                                                       | 27.2                   | 36.7267                     | 37.4571                   | 9.5267                | 10.2571               | 37.2865                                                  | 38.0280                   | 10.0865               | 10.8280               |
| 16                                                       | 22.8                   | 24.7412                     | 25.2332                   | 1.9412                | 2.4332                | 25.2253                                                  | 25.7270                   | 2.4253                | 2.9270                |
| 17                                                       | 22.9                   | 23.5896                     | 24.0588                   | 0.6896                | 1.1588                | 23.8777                                                  | 24.3525                   | 0.9777                | 1.4525                |
| 18                                                       | 34                     | 27.5129                     | 28.0600                   | -6.4871               | -5.9400               | 27.8182                                                  | 28.3715                   | -6.1818               | -5.6285               |
| 19                                                       | 22.1                   | 35.4180                     | 36.1224                   | 13.3180               | 14.0224               | 35.5508                                                  | 36.2578                   | 13.4508               | 14.1578               |
| 20                                                       | 16.2                   | 29.8841                     | 30.4784                   | 13.6841               | 14.2784               | 30.2610                                                  | 30.8628                   | 14.0610               | 14.6628               |
| MAE = 4.93, and CMAE = 3.55 ppm. R <sup>2</sup> = 0.9842 |                        |                             |                           |                       |                       | MAE = 5.87, and CMAE = 4.46 ppm. R <sup>2</sup> = 0.9851 |                           |                       |                       |



**Table S7.** Experimental chemical shifts of compound **1**, calculated shielding tensors and chemical shifts of isomer **1** in gas phase with TMS as reference.

|              |        | <b>1A-1</b>    |          | <b>1A-2</b>    |          | <b>1B-1</b>    |          | <b>1B-2</b>    |          |
|--------------|--------|----------------|----------|----------------|----------|----------------|----------|----------------|----------|
| Nuclie       | exptl. | $\sigma_{iso}$ | $\Delta$ | $\sigma_{iso}$ | $\Delta$ | $\sigma_{iso}$ | $\Delta$ | $\sigma_{iso}$ | $\Delta$ |
| 1            | 31.9   | 163.94         | 32.30    | 163.94         | 32.30    | 160.54         | 35.70    | 155.84         | 40.40    |
| 2            | 19     | 174.26         | 21.98    | 174.26         | 21.98    | 175.15         | 21.09    | 170.50         | 25.74    |
| 3            | 40.4   | 155.74         | 40.50    | 155.74         | 40.50    | 157.72         | 38.52    | 152.79         | 43.45    |
| 4            | 33.1   | 160.22         | 36.02    | 160.22         | 36.02    | 159.77         | 36.47    | 154.37         | 41.87    |
| 5            | 52.6   | 143.79         | 52.45    | 143.80         | 52.44    | 135.08         | 61.16    | 129.71         | 66.53    |
| 6            | 30.3   | 164.50         | 31.74    | 164.50         | 31.74    | 169.48         | 26.76    | 165.86         | 30.38    |
| 7            | 85.1   | 109.67         | 86.57    | 109.67         | 86.57    | 110.49         | 85.75    | 105.12         | 91.12    |
| 8            | 68.3   | 126.46         | 69.78    | 126.46         | 69.78    | 116.33         | 79.91    | 111.28         | 84.96    |
| 9            | 45.3   | 147.29         | 48.95    | 147.30         | 48.94    | 146.31         | 49.93    | 140.85         | 55.39    |
| 10           | 203.8  | -4.82          | 201.06   | -4.82          | 201.06   | 9.57           | 186.67   | 5.44           | 190.80   |
| 11           | 127.8  | 72.07          | 124.17   | 72.07          | 124.17   | 59.85          | 136.39   | 56.44          | 139.80   |
| 12           | 179.5  | 13.31          | 182.93   | 13.32          | 182.93   | 32.04          | 164.20   | 28.58          | 167.66   |
| 13           | 85.5   | 109.88         | 86.36    | 109.88         | 86.36    | 105.16         | 91.08    | 100.69         | 95.55    |
| 14           | 175.6  | 22.44          | 173.80   | 22.44          | 173.80   | 31.03          | 165.21   | 27.27          | 168.97   |
| 15           | 27.2   | 165.86         | 30.38    | 165.86         | 30.38    | 164.46         | 31.78    | 156.08         | 40.17    |
| 16           | 22.8   | 171.57         | 24.67    | 171.57         | 24.67    | 173.69         | 22.55    | 169.98         | 26.26    |
| 17           | 22.9   | 174.12         | 22.12    | 174.11         | 22.13    | 177.03         | 19.21    | 169.61         | 26.63    |
| 18           | 34     | 162.77         | 33.47    | 162.77         | 33.47    | 170.88         | 25.36    | 167.23         | 29.01    |
| 19           | 22.1   | 173.47         | 22.77    | 173.47         | 22.78    | 163.09         | 33.15    | 159.25         | 36.99    |
| 20           | 16.2   | 180.07         | 16.17    | 180.07         | 16.17    | 168.74         | 27.50    | 164.70         | 31.54    |
| H-1 $\alpha$ | 1.95   | 29.55          | 2.05     | 29.55          | 2.05     | 30.11          | 1.48     | 30.12          | 1.48     |
| H-1 $\beta$  | 1.53   | 30.10          | 1.49     | 30.10          | 1.49     | 30.28          | 1.32     | 30.31          | 1.29     |
| H-2 $\alpha$ | 1.44   | 30.26          | 1.34     | 30.26          | 1.34     | 30.32          | 1.28     | 30.38          | 1.21     |
| H-2 $\beta$  | 1.63   | 29.87          | 1.73     | 29.87          | 1.73     | 29.85          | 1.75     | 29.86          | 1.74     |
| H-3 $\alpha$ | 1.45   | 30.27          | 1.32     | 30.27          | 1.32     | 29.78          | 1.81     | 29.83          | 1.76     |
| H-3 $\beta$  | 1.26   | 30.29          | 1.31     | 30.29          | 1.31     | 29.65          | 1.94     | 29.68          | 1.92     |
| H-5          | 2.3    | 28.93          | 2.67     | 28.93          | 2.67     | 30.12          | 1.47     | 30.15          | 1.44     |
| H-6 $\alpha$ | 2.26   | 29.50          | 2.09     | 29.50          | 2.09     | 29.71          | 1.88     | 29.81          | 1.79     |
| H-6 $\beta$  | 1.81   | 29.73          | 1.87     | 29.73          | 1.87     | 29.18          | 2.42     | 29.27          | 2.33     |
| H-7 $\alpha$ | 4.43   | 27.35          | 4.25     | 27.35          | 4.25     | 27.26          | 4.34     | 27.29          | 4.31     |
| H-11         | 5.99   | 25.56          | 6.03     | 25.56          | 6.03     | 25.55          | 6.04     | 25.70          | 5.89     |
| H-15         | 2.76   | 28.88          | 2.72     | 28.88          | 2.71     | 28.69          | 2.90     | 29.04          | 2.55     |
| H-16a        | 1.12   | 30.42          | 1.18     | 30.42          | 1.18     | 30.41          | 1.19     | 30.58          | 1.01     |
| H-16b        |        | 30.38          | 1.22     | 30.38          | 1.22     | 29.81          | 1.78     | 30.42          | 1.17     |
| H-16c        |        | 31.01          | 0.58     | 31.01          | 0.58     | 30.96          | 0.63     | 30.00          | 1.59     |
| H-17a        | 1.27   | 30.43          | 1.17     | 30.43          | 1.17     | 30.50          | 1.10     | 30.46          | 1.14     |
| H-17b        |        | 30.40          | 1.20     | 30.40          | 1.20     | 30.26          | 1.33     | 30.69          | 0.91     |
| H-17c        |        | 30.38          | 1.22     | 30.38          | 1.22     | 30.64          | 0.95     | 30.23          | 1.36     |
| H-18a        | 0.92   | 30.89          | 0.70     | 30.89          | 0.70     | 30.29          | 1.31     | 30.35          | 1.25     |

|       |      |       |      |       |      |       |      |       |      |
|-------|------|-------|------|-------|------|-------|------|-------|------|
| H-18b |      | 30.50 | 1.10 | 30.50 | 1.10 | 30.82 | 0.78 | 30.88 | 0.71 |
| H-18c |      | 30.87 | 0.72 | 30.87 | 0.72 | 30.70 | 0.89 | 30.77 | 0.82 |
| H-19a | 0.94 | 30.62 | 0.98 | 30.62 | 0.98 | 30.40 | 1.20 | 30.44 | 1.15 |
| H-19b |      | 31.10 | 0.49 | 31.10 | 0.49 | 30.89 | 0.70 | 30.96 | 0.64 |
| H-19c |      | 30.28 | 1.32 | 30.28 | 1.32 | 30.58 | 1.02 | 30.64 | 0.96 |
| H-20a | 1.18 | 30.31 | 1.28 | 30.31 | 1.28 | 30.33 | 1.26 | 30.41 | 1.18 |
| H-20b |      | 30.96 | 0.64 | 30.96 | 0.64 | 30.15 | 1.45 | 30.16 | 1.44 |
| H-20c |      | 29.91 | 1.69 | 29.91 | 1.69 | 30.70 | 0.89 | 30.82 | 0.77 |
| OH    | 2.96 | 28.83 | 2.76 | 28.83 | 2.76 | 27.88 | 3.72 | 27.86 | 3.73 |

**Table S8.** Experimental chemical shifts of compound **1**, calculated shielding tensors and chemical shifts of isomer **1** in chloroform with TMS as reference.

| Nuclie       | exptl. | <b>1A-1</b>  |          | <b>1A-2</b>  |          | <b>1B-1</b>  |          | <b>1B-2</b>  |          |
|--------------|--------|--------------|----------|--------------|----------|--------------|----------|--------------|----------|
|              |        | $\sigma$ iso | $\Delta$ |
| 1            | 31.9   | 163.57       | 33.30    | 163.57       | 33.30    | 160.96       | 35.91    | 156.26       | 40.62    |
| 2            | 19     | 174.47       | 22.41    | 174.47       | 22.41    | 175.39       | 21.48    | 170.71       | 26.16    |
| 3            | 40.4   | 155.70       | 41.17    | 155.70       | 41.17    | 157.92       | 38.96    | 152.96       | 43.92    |
| 4            | 33.1   | 160.15       | 36.72    | 160.15       | 36.72    | 159.62       | 37.25    | 154.22       | 42.65    |
| 5            | 52.6   | 143.43       | 53.44    | 143.43       | 53.44    | 135.64       | 61.23    | 130.28       | 66.60    |
| 6            | 30.3   | 164.63       | 32.24    | 164.63       | 32.24    | 169.28       | 27.60    | 165.65       | 31.22    |
| 7            | 85.1   | 109.29       | 87.58    | 109.29       | 87.58    | 110.31       | 86.56    | 104.95       | 91.93    |
| 8            | 68.3   | 126.06       | 70.82    | 126.06       | 70.81    | 115.28       | 81.60    | 110.20       | 86.67    |
| 9            | 45.3   | 147.19       | 49.69    | 147.19       | 49.68    | 145.70       | 51.17    | 140.24       | 56.64    |
| 10           | 203.8  | -6.48        | 203.35   | -6.48        | 203.35   | 6.58         | 190.29   | 2.43         | 194.44   |
| 11           | 127.8  | 71.31        | 125.56   | 71.31        | 125.56   | 60.00        | 136.88   | 56.51        | 140.36   |
| 12           | 179.5  | 11.90        | 184.98   | 11.90        | 184.97   | 30.34        | 166.53   | 27.00        | 169.88   |
| 13           | 85.5   | 109.57       | 87.31    | 109.57       | 87.30    | 104.83       | 92.05    | 100.38       | 96.50    |
| 14           | 175.6  | 21.26        | 175.61   | 21.26        | 175.61   | 29.38        | 167.50   | 25.69        | 171.18   |
| 15           | 27.2   | 165.53       | 31.34    | 165.54       | 31.34    | 164.09       | 32.79    | 156.46       | 40.41    |
| 16           | 22.8   | 172.00       | 24.87    | 172.00       | 24.87    | 174.13       | 22.74    | 169.92       | 26.95    |
| 17           | 22.9   | 174.50       | 22.38    | 174.49       | 22.38    | 177.44       | 19.43    | 169.91       | 26.97    |
| 18           | 34     | 163.05       | 33.83    | 163.05       | 33.82    | 171.22       | 25.65    | 167.55       | 29.32    |
| 19           | 22.1   | 173.47       | 23.41    | 173.92       | 22.96    | 163.61       | 33.27    | 159.74       | 37.14    |
| 20           | 16.2   | 180.20       | 16.68    | 180.20       | 16.68    | 169.01       | 27.86    | 164.95       | 31.93    |
|              |        |              |          |              |          |              |          |              |          |
| H-1 $\alpha$ | 1.95   | 29.64        | 1.95     | 29.64        | 1.95     | 30.04        | 1.55     | 30.04        | 1.55     |
| H-1 $\beta$  | 1.53   | 30.13        | 1.46     | 30.13        | 1.46     | 30.21        | 1.38     | 30.25        | 1.34     |
| H-2 $\alpha$ | 1.44   | 30.24        | 1.35     | 30.24        | 1.35     | 30.27        | 1.32     | 30.34        | 1.25     |
| H-2 $\beta$  | 1.63   | 29.81        | 1.78     | 29.81        | 1.78     | 29.78        | 1.81     | 29.79        | 1.79     |
| H-3 $\alpha$ | 1.45   | 30.34        | 1.25     | 30.33        | 1.25     | 29.65        | 1.94     | 29.70        | 1.89     |
| H-3 $\beta$  | 1.26   | 30.23        | 1.36     | 30.23        | 1.36     | 29.63        | 1.96     | 29.66        | 1.93     |
| H-5          | 2.3    | 29.04        | 2.55     | 29.04        | 2.55     | 30.08        | 1.51     | 30.12        | 1.47     |
| H-6 $\alpha$ | 2.26   | 29.36        | 2.23     | 29.36        | 2.23     | 29.56        | 2.03     | 29.66        | 1.93     |

|              |      |       |      |       |      |       |      |       |      |
|--------------|------|-------|------|-------|------|-------|------|-------|------|
| H-6 $\beta$  | 1.81 | 29.69 | 1.90 | 29.69 | 1.90 | 29.25 | 2.33 | 29.34 | 2.25 |
| H-7 $\alpha$ | 4.43 | 27.15 | 4.44 | 27.15 | 4.44 | 27.09 | 4.50 | 27.11 | 4.48 |
| H-11         | 5.99 | 25.40 | 6.19 | 25.40 | 6.19 | 25.43 | 6.16 | 25.57 | 6.01 |
| H-15         | 2.76 | 28.83 | 2.76 | 28.83 | 2.76 | 28.68 | 2.91 | 28.87 | 2.72 |
| H-16a        | 1.12 | 30.33 | 1.26 | 30.33 | 1.26 | 30.32 | 1.26 | 30.45 | 1.14 |
| H-16b        |      | 30.51 | 1.08 | 30.51 | 1.08 | 29.95 | 1.64 | 30.49 | 1.09 |
| H-16c        |      | 30.89 | 0.70 | 30.89 | 0.70 | 30.81 | 0.78 | 30.20 | 1.39 |
| H-17a        | 1.27 | 30.35 | 1.24 | 30.35 | 1.24 | 30.43 | 1.16 | 30.39 | 1.20 |
| H-17b        |      | 30.44 | 1.15 | 30.44 | 1.15 | 30.27 | 1.32 | 30.56 | 1.03 |
| H-17c        |      | 30.27 | 1.32 | 30.27 | 1.32 | 30.55 | 1.04 | 30.36 | 1.23 |
| H-18a        | 0.92 | 30.94 | 0.65 | 30.94 | 0.65 | 30.32 | 1.27 | 30.38 | 1.21 |
| H-18b        |      | 30.43 | 1.15 | 30.43 | 1.15 | 30.79 | 0.80 | 30.86 | 0.72 |
| H-18c        |      | 30.85 | 0.74 | 30.85 | 0.74 | 30.72 | 0.87 | 30.79 | 0.80 |
| H-19a        | 0.94 | 30.57 | 1.01 | 30.57 | 1.01 | 30.39 | 1.20 | 30.44 | 1.15 |
| H-19b        |      | 31.08 | 0.51 | 31.08 | 0.51 | 30.88 | 0.71 | 30.95 | 0.64 |
| H-19c        |      | 30.27 | 1.32 | 30.27 | 1.32 | 30.51 | 1.08 | 30.58 | 1.01 |
| H-20a        | 1.18 | 30.23 | 1.35 | 30.23 | 1.35 | 30.18 | 1.40 | 30.27 | 1.32 |
| H-20b        |      | 30.95 | 0.64 | 30.95 | 0.64 | 30.30 | 1.29 | 30.32 | 1.27 |
| H-20c        |      | 29.93 | 1.66 | 29.93 | 1.66 | 30.66 | 0.93 | 30.78 | 0.81 |
| OH           | 2.96 | 28.58 | 3.01 | 28.57 | 3.02 | 27.72 | 3.87 | 27.71 | 3.88 |

| Functional       | Solvent?                                                                                    |                                                                                           | Basis Set   |          | Type of Data    |          |
|------------------|---------------------------------------------------------------------------------------------|-------------------------------------------------------------------------------------------|-------------|----------|-----------------|----------|
| mPW1PW91         | PCM                                                                                         |                                                                                           | 6-31+G(d,p) |          | Unscaled Shifts |          |
|                  | Isomer 1                                                                                    | Isomer 2                                                                                  | Isomer 3    | Isomer 4 | Isomer 5        | Isomer 6 |
| sDP4+ (H data)   |  100.00% |  0.00% | –           | –        | –               | –        |
| sDP4+ (C data)   |  100.00% |  0.00% | –           | –        | –               | –        |
| sDP4+ (all data) |  100.00% |  0.00% | –           | –        | –               | –        |
| uDP4+ (H data)   |  100.00% |  0.00% | –           | –        | –               | –        |
| uDP4+ (C data)   |  100.00% |  0.00% | –           | –        | –               | –        |
| uDP4+ (all data) |  100.00% |  0.00% | –           | –        | –               | –        |
| DP4+ (H data)    |  100.00% |  0.00% | –           | –        | –               | –        |
| DP4+ (C data)    |  100.00% |  0.00% | –           | –        | –               | –        |
| DP4+ (all data)  |  100.00% |  0.00% | –           | –        | –               | –        |

**Figure. S4.** Detailed DP4+ probability of compound **1** (calculated at mPW1PW91/6-31G (d, p) level in gas with PCM model).

| Functional       | Solvent?  |          | Basis Set    |          | Type of Data    |          |
|------------------|-----------|----------|--------------|----------|-----------------|----------|
| mPW1PW91         | Gas Phase |          | 6-31+G(d, p) |          | Unscaled Shifts |          |
|                  | Isomer 1  | Isomer 2 | Isomer 3     | Isomer 4 | Isomer 5        | Isomer 6 |
| sDP4+ (H data)   | 100.00%   | 0.00%    | -            | -        | -               | -        |
| sDP4+ (C data)   | 100.00%   | 0.00%    | -            | -        | -               | -        |
| sDP4+ (all data) | 100.00%   | 0.00%    | -            | -        | -               | -        |
| uDP4+ (H data)   | 100.00%   | 0.00%    | -            | -        | -               | -        |
| uDP4+ (C data)   | 100.00%   | 0.00%    | -            | -        | -               | -        |
| uDP4+ (all data) | 100.00%   | 0.00%    | -            | -        | -               | -        |
| DP4+ (H data)    | 100.00%   | 0.00%    | -            | -        | -               | -        |
| DP4+ (C data)    | 100.00%   | 0.00%    | -            | -        | -               | -        |
| DP4+ (all data)  | 100.00%   | 0.00%    | -            | -        | -               | -        |

**Figure S5.** Detailed DP4+ probability of compound **1** (calculated at mPW1PW91/6-31G (d, p) level in chloroform with PCM model.

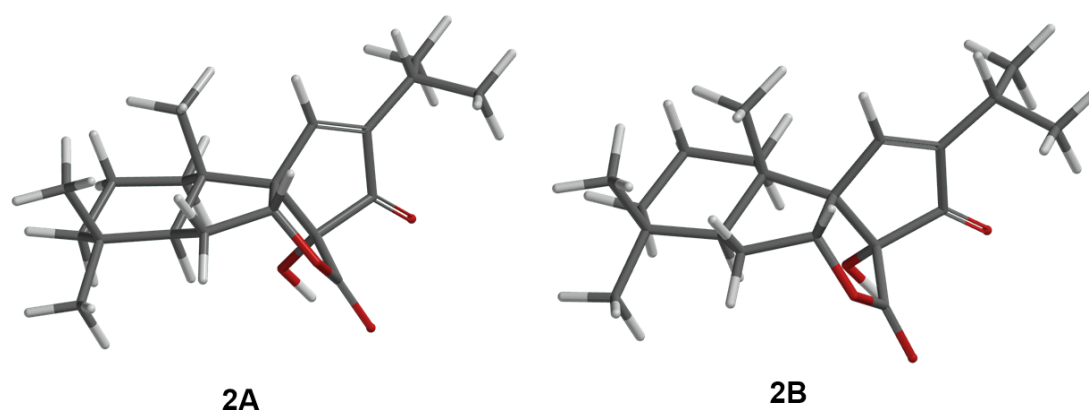

**Figure S6.** Possible conformers of **2** for ECD calculation.

**Table S9.** Important thermodynamic parameters and Boltzmann distributions of the optimized isomer **2** at B3LYP/6-31 + G (d, p) level in the gas phase.

| Conformations | Energy (a.u) | $\Delta G(\text{kcal/mol})$ | %    | Number of imaginary frequencies |
|---------------|--------------|-----------------------------|------|---------------------------------|
| 2A            | -1079.574196 | 0                           | 72.6 | 0                               |
| 2B            | -1079.573275 | 0.58                        | 27.4 | 0                               |

**Table S10.** Optimized Z-matrixes of compound **2** in the gas phase ( $\text{\AA}$ ) at B3LYP/6-31+ G (d, p) level

| 2A |          |           |           | 2B |           |           |           |
|----|----------|-----------|-----------|----|-----------|-----------|-----------|
| C  | 2.375072 | -2.144281 | 1.415352  | C  | -2.518732 | -2.244428 | 1.138663  |
| C  | 3.457398 | -1.049382 | 1.382599  | C  | -3.521408 | -1.089087 | 1.309422  |
| C  | 2.071052 | 0.244816  | -0.232781 | C  | -2.107397 | 0.330796  | -0.171744 |
| C  | 0.934553 | -0.827411 | -0.207758 | C  | -1.046763 | -0.804652 | -0.344679 |
| C  | 0.962594 | -1.586788 | 1.134051  | C  | -1.081197 | -1.745381 | 0.876584  |
| C  | 3.52254  | -0.228337 | 0.063153  | C  | -3.57665  | -0.085371 | 0.121528  |
| C  | 4.203231 | -1.045816 | -1.057634 | C  | -4.351001 | -0.68836  | -1.071269 |

|   |           |           |           |   |           |           |           |
|---|-----------|-----------|-----------|---|-----------|-----------|-----------|
| C | 4.397631  | 1.022062  | 0.309592  | C | -4.352776 | 1.170019  | 0.580463  |
| C | 1.003153  | -1.855055 | -1.366308 | C | -1.224024 | -1.654015 | -1.630446 |
| C | 1.77278   | 1.076777  | -1.495795 | C | -1.796028 | 1.30904   | -1.320999 |
| C | 0.232049  | 1.081529  | -1.588226 | C | -0.262308 | 1.233008  | -1.474998 |
| C | -0.311166 | 0.10616   | -0.488172 | C | 0.24978   | 0.078122  | -0.547379 |
| C | -0.847836 | 1.059897  | 0.625478  | C | 0.889687  | 0.825588  | 0.664611  |
| C | -2.26286  | 0.534232  | 0.938851  | C | 2.27834   | 0.173284  | 0.838509  |
| C | -2.668886 | -0.378155 | -0.138004 | C | 2.586894  | -0.586079 | -0.382533 |
| C | -1.587229 | -0.586106 | -0.921612 | C | 1.460776  | -0.619546 | -1.129043 |
| C | -4.063554 | -0.943921 | -0.245747 | C | 3.921086  | -1.215232 | -0.70456  |
| C | -4.40006  | -1.43755  | -1.65976  | C | 5.042794  | -0.159293 | -0.76787  |
| C | -4.276583 | -2.06081  | 0.800616  | C | 4.268506  | -2.345515 | 0.286237  |
| O | -2.864073 | 0.861765  | 1.953054  | O | 2.916021  | 0.298554  | 1.87527   |
| C | -0.927039 | 2.435188  | -0.086495 | C | 1.035872  | 2.281453  | 0.15274   |
| O | -1.410881 | 3.448206  | 0.370067  | O | 1.602043  | 3.186307  | 0.726794  |
| O | -0.330434 | 2.394077  | -1.286761 | O | 0.396456  | 2.451125  | -1.014128 |
| O | -0.10975  | 1.233246  | 1.815332  | O | 0.210301  | 0.870856  | 1.899779  |
| H | 1.841181  | 0.894588  | 0.62061   | H | -1.802826 | 0.839425  | 0.751542  |
| H | 2.621183  | -2.940399 | 0.702494  | H | -2.84607  | -2.911443 | 0.332277  |
| H | 2.378028  | -2.618438 | 2.40421   | H | -2.520568 | -2.855438 | 2.049427  |
| H | 4.442259  | -1.494372 | 1.576423  | H | -4.527452 | -1.492695 | 1.483866  |
| H | 3.265248  | -0.350715 | 2.20935   | H | -3.250772 | -0.529062 | 2.216028  |
| H | 0.231007  | -2.404646 | 1.126032  | H | -0.410761 | -2.599733 | 0.718945  |
| H | 0.686078  | -0.910615 | 1.946236  | H | -0.728021 | -1.213928 | 1.763075  |
| H | 4.128878  | -0.543258 | -2.02798  | H | -4.282943 | -0.052603 | -1.960512 |
| H | 5.269405  | -1.15587  | -0.828133 | H | -5.412222 | -0.770544 | -0.809379 |
| H | 3.796187  | -2.052013 | -1.170707 | H | -4.012767 | -1.687933 | -1.349045 |
| H | 3.95479   | 1.675786  | 1.070052  | H | -3.839517 | 1.678841  | 1.404741  |
| H | 5.394333  | 0.727557  | 0.65858   | H | -4.473473 | 1.888746  | -0.23795  |
| H | 4.528085  | 1.608581  | -0.606968 | H | -5.354834 | 0.892872  | 0.928231  |
| H | 1.000064  | -1.391999 | -2.357536 | H | -2.144552 | -2.23366  | -1.603357 |
| H | 1.898721  | -2.4691   | -1.302617 | H | -1.245267 | -1.055977 | -2.546365 |
| H | 0.149041  | -2.53699  | -1.31473  | H | -0.403948 | -2.372512 | -1.719655 |
| H | 2.153393  | 2.099954  | -1.439402 | H | -2.107373 | 2.336158  | -1.112958 |
| H | 2.192362  | 0.622655  | -2.398125 | H | -2.272926 | 1.008412  | -2.258339 |
| H | -0.134258 | 0.84321   | -2.587886 | H | 0.055348  | 1.118794  | -2.512532 |
| H | -1.603867 | -1.1903   | -1.821655 | H | 1.411773  | -1.097412 | -2.102312 |
| H | -4.752513 | -0.126065 | 0.006424  | H | 3.82318   | -1.662475 | -1.701634 |
| H | -5.443694 | -1.764614 | -1.70179  | H | 5.985606  | -0.633646 | -1.059617 |
| H | -4.26124  | -0.647787 | -2.405431 | H | 4.81333   | 0.61989   | -1.502052 |
| H | -3.775063 | -2.291496 | -1.945108 | H | 5.1921    | 0.319252  | 0.205367  |
| H | -5.314941 | -2.407309 | 0.772012  | H | 5.210577  | -2.820052 | -0.007966 |
| H | -4.063244 | -1.708019 | 1.813613  | H | 3.489369  | -3.114532 | 0.298412  |

|   |           |           |          |   |          |           |          |
|---|-----------|-----------|----------|---|----------|-----------|----------|
| H | -3.62451  | -2.915546 | 0.588523 | H | 4.384966 | -1.957457 | 1.302595 |
| H | -0.756851 | 1.446577  | 2.511566 | H | 0.898774 | 0.917848  | 2.588004 |

**Table S11.** Key transitions, oscillator strengths, and rotatory strengths in the ECD spectra of conformers **2A** at the B3LYP/6-31 + G (d, p) level in MeOH with PCM.

| <i>Num</i> | <i>Exited states</i> | <i>CI Coefficient</i> | $\Delta E$ (eV) | $\lambda$ (nm) | <i>f</i> | <i>R(vel)</i> | <i>R(len)</i> |
|------------|----------------------|-----------------------|-----------------|----------------|----------|---------------|---------------|
| 1          | 90 -> 91             | 0.68854               | 3.7506          | 330.57         | 0.0031   | 1.1290        | 0.8739        |
| 2          | 85 -> 91             | -0.11957              | 4.5610          | 271.84         | 0.0596   | -63.2649      | -65.2745      |
|            | 87 -> 91             | -0.33194              |                 |                |          |               |               |
|            | 88 -> 91             | 0.18138               |                 |                |          |               |               |
|            | 89 -> 91             | 0.54876               |                 |                |          |               |               |
| 3          | 87 -> 91             | -0.37692              | 4.7198          | 262.69         | 0.0723   | -25.4010      | -26.3873      |
|            | 88 -> 91             | 0.41571               |                 |                |          |               |               |
|            | 89 -> 91             | -0.39282              |                 |                |          |               |               |
| 4          | 87 -> 91             | 0.44646               | 4.9223          | 251.88         | 0.0159   | 15.9468       | 16.7064       |
|            | 88 -> 91             | 0.52501               |                 |                |          |               |               |
|            | 89 -> 91             | 0.10716               |                 |                |          |               |               |
| 5          | 84 -> 91             | -0.13039              | 5.2027          | 238.31         | 0.0037   | -0.8148       | -1.0630       |
|            | 85 -> 91             | -0.14670              |                 |                |          |               |               |
|            | 86 -> 91             | 0.62950               |                 |                |          |               |               |
|            | 90 -> 92             | -0.17213              |                 |                |          |               |               |
| 6          | 83 -> 91             | -0.14746              | 5.3194          | 233.08         | 0.0053   | 12.6055       | 14.4323       |
|            | 85 -> 91             | 0.39348               |                 |                |          |               |               |
|            | 85 -> 92             | -0.12980              |                 |                |          |               |               |
|            | 86 -> 91             | 0.26500               |                 |                |          |               |               |
|            | 87 -> 91             | -0.16009              |                 |                |          |               |               |
|            | 87 -> 92             | -0.21283              |                 |                |          |               |               |
|            | 88 -> 92             | 0.10387               |                 |                |          |               |               |
|            | 90 -> 92             | 0.32561               |                 |                |          |               |               |
| 7          | 85 -> 91             | -0.45442              | 5.4441          | 227.74         | 0.0102   | 11.0716       | 10.2373       |
|            | 90 -> 92             | 0.51116               |                 |                |          |               |               |
| 8          | 84 -> 91             | 0.66078               | 5.4756          | 226.43         | 0.0133   | 25.9151       | 26.8282       |
|            | 86 -> 91             | 0.12162               |                 |                |          |               |               |
| 9          | 83 -> 91             | -0.28613              | 5.6326          | 220.12         | 0.0129   | -17.7370      | -18.6423      |
|            | 85 -> 91             | -0.18426              |                 |                |          |               |               |
|            | 85 -> 92             | -0.12761              |                 |                |          |               |               |
|            | 87 -> 92             | -0.25494              |                 |                |          |               |               |
|            | 88 -> 92             | 0.17851               |                 |                |          |               |               |
|            | 89 -> 92             | 0.42162               |                 |                |          |               |               |
|            | 90 -> 92             | -0.20252              |                 |                |          |               |               |
| 10         | 83 -> 91             | 0.49923               | 5.7578          | 215.33         | 0.0285   | -22.4658      | -23.3540      |
|            | 89 -> 92             | 0.44486               |                 |                |          |               |               |
| 11         | 79 -> 91             | 0.10299               | 5.9170          | 209.54         | 0.0724   | 60.7137       | 61.7753       |

|    |          |          |        |        |        |          |          |
|----|----------|----------|--------|--------|--------|----------|----------|
|    | 83 -> 91 | -0.34285 |        |        |        |          |          |
|    | 85 -> 92 | 0.13880  |        |        |        |          |          |
|    | 87 -> 92 | 0.34972  |        |        |        |          |          |
|    | 88 -> 92 | -0.24362 |        |        |        |          |          |
|    | 89 -> 92 | 0.30840  |        |        |        |          |          |
|    | 90 -> 92 | 0.16689  |        |        |        |          |          |
| 12 | 80 -> 91 | 0.27808  | 5.9706 | 207.66 | 0.0152 | 17.1066  | 16.8753  |
|    | 81 -> 91 | 0.20178  |        |        |        |          |          |
|    | 82 -> 91 | 0.58168  |        |        |        |          |          |
|    | 85 -> 91 | 0.11254  |        |        |        |          |          |
| 13 | 80 -> 91 | 0.51087  | 6.0096 | 206.31 | 0.0010 | -1.6082  | -1.6473  |
|    | 81 -> 91 | 0.30454  |        |        |        |          |          |
|    | 82 -> 91 | -0.34134 |        |        |        |          |          |
| 14 | 77 -> 91 | 0.19315  | 6.0673 | 204.35 | 0.0096 | 5.1855   | 4.8184   |
|    | 78 -> 91 | 0.39314  |        |        |        |          |          |
|    | 79 -> 91 | 0.28073  |        |        |        |          |          |
|    | 80 -> 91 | -0.24486 |        |        |        |          |          |
|    | 81 -> 91 | 0.25931  |        |        |        |          |          |
|    | 83 -> 91 | -0.12264 |        |        |        |          |          |
|    | 85 -> 91 | -0.12978 |        |        |        |          |          |
|    | 87 -> 92 | -0.12040 |        |        |        |          |          |
|    | 88 -> 92 | 0.12590  |        |        |        |          |          |
| 15 | 75 -> 91 | 0.10509  | 6.2008 | 199.95 | 0.0051 | -10.8210 | -11.7822 |
|    | 79 -> 91 | 0.28285  |        |        |        |          |          |
|    | 80 -> 91 | 0.11973  |        |        |        |          |          |
|    | 81 -> 91 | -0.21689 |        |        |        |          |          |
|    | 87 -> 92 | 0.22497  |        |        |        |          |          |
|    | 88 -> 92 | 0.51627  |        |        |        |          |          |
| 16 | 75 -> 91 | 0.12229  | 6.2296 | 199.02 | 0.0077 | 6.5419   | 6.7815   |
|    | 77 -> 91 | 0.12152  |        |        |        |          |          |
|    | 79 -> 91 | 0.40779  |        |        |        |          |          |
|    | 80 -> 91 | 0.13400  |        |        |        |          |          |
|    | 81 -> 91 | -0.30331 |        |        |        |          |          |
|    | 87 -> 92 | -0.27090 |        |        |        |          |          |
|    | 88 -> 92 | -0.30913 |        |        |        |          |          |
| 17 | 75 -> 91 | -0.19227 | 6.3102 | 196.48 | 0.0012 | -2.5279  | -2.0594  |
|    | 77 -> 91 | 0.17826  |        |        |        |          |          |
|    | 78 -> 91 | 0.43347  |        |        |        |          |          |
|    | 79 -> 91 | -0.21880 |        |        |        |          |          |
|    | 80 -> 91 | 0.21324  |        |        |        |          |          |
|    | 81 -> 91 | -0.36194 |        |        |        |          |          |
| 18 | 77 -> 91 | 0.58772  | 6.4455 | 192.36 | 0.0010 | 6.1099   | 5.9449   |
|    | 78 -> 91 | -0.26145 |        |        |        |          |          |

|    |          |          |        |        |        |         |         |
|----|----------|----------|--------|--------|--------|---------|---------|
|    | 86 -> 92 | -0.17537 |        |        |        |         |         |
| 19 | 77 -> 91 | 0.15097  | 6.5009 | 190.72 | 0.0161 | -1.0888 | -1.5062 |
|    | 85 -> 92 | -0.12204 |        |        |        |         |         |
|    | 86 -> 92 | 0.65384  |        |        |        |         |         |
| 20 | 77 -> 91 | -0.10291 | 6.5444 | 189.45 | 0.0112 | 5.9038  | 5.4923  |
|    | 85 -> 92 | -0.14662 |        |        |        |         |         |
|    | 87 -> 92 | 0.10856  |        |        |        |         |         |
|    | 90 -> 93 | 0.54211  |        |        |        |         |         |
|    | 90 -> 94 | -0.30354 |        |        |        |         |         |
|    | 90 -> 95 | 0.12527  |        |        |        |         |         |



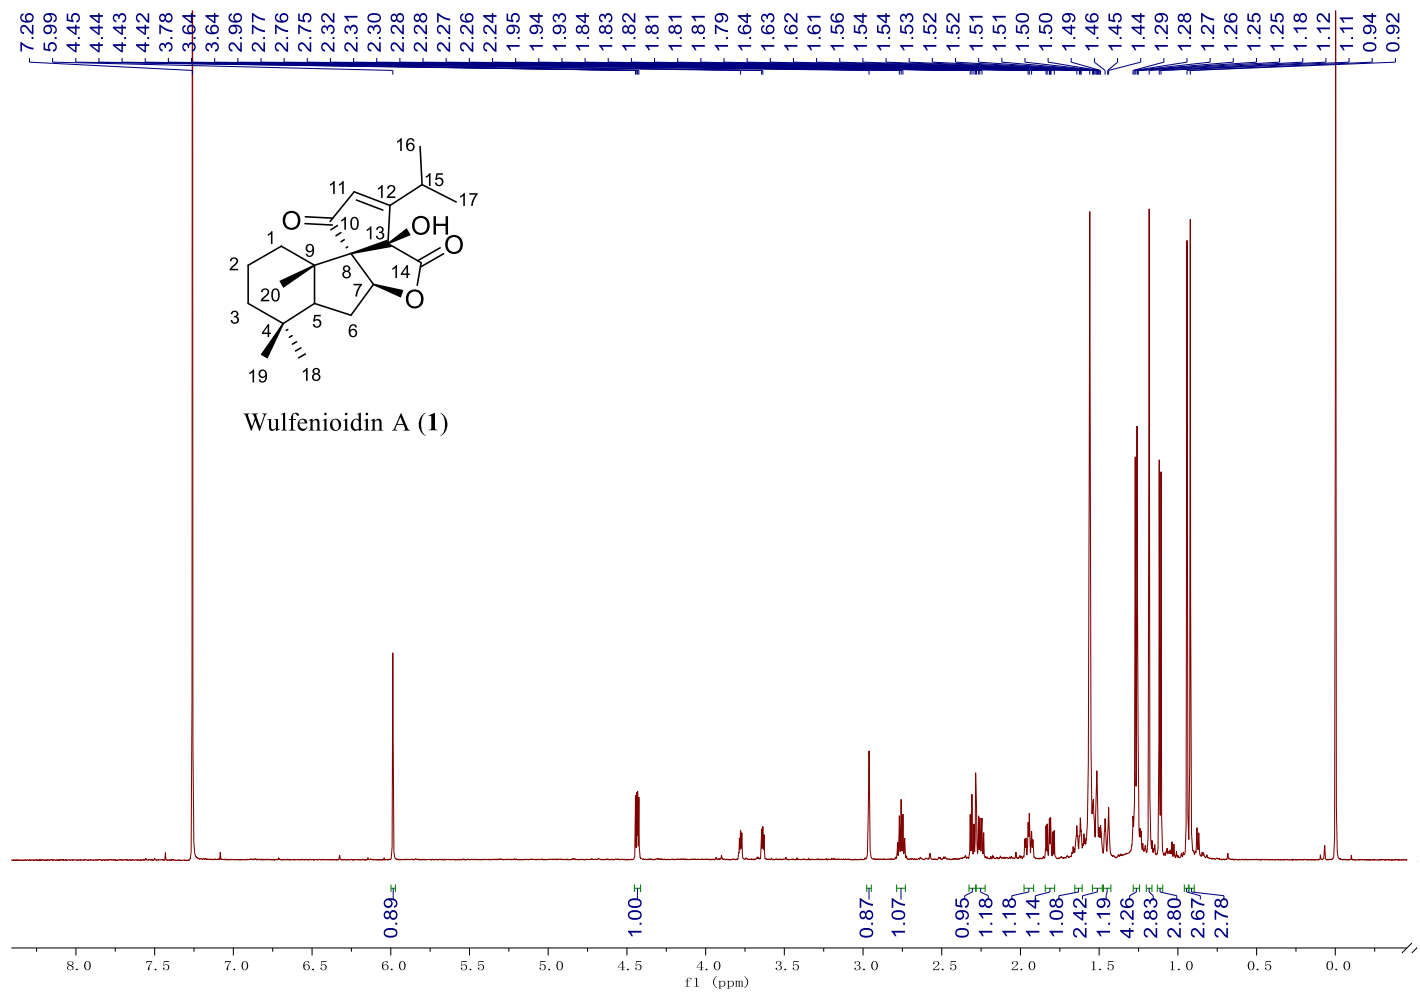

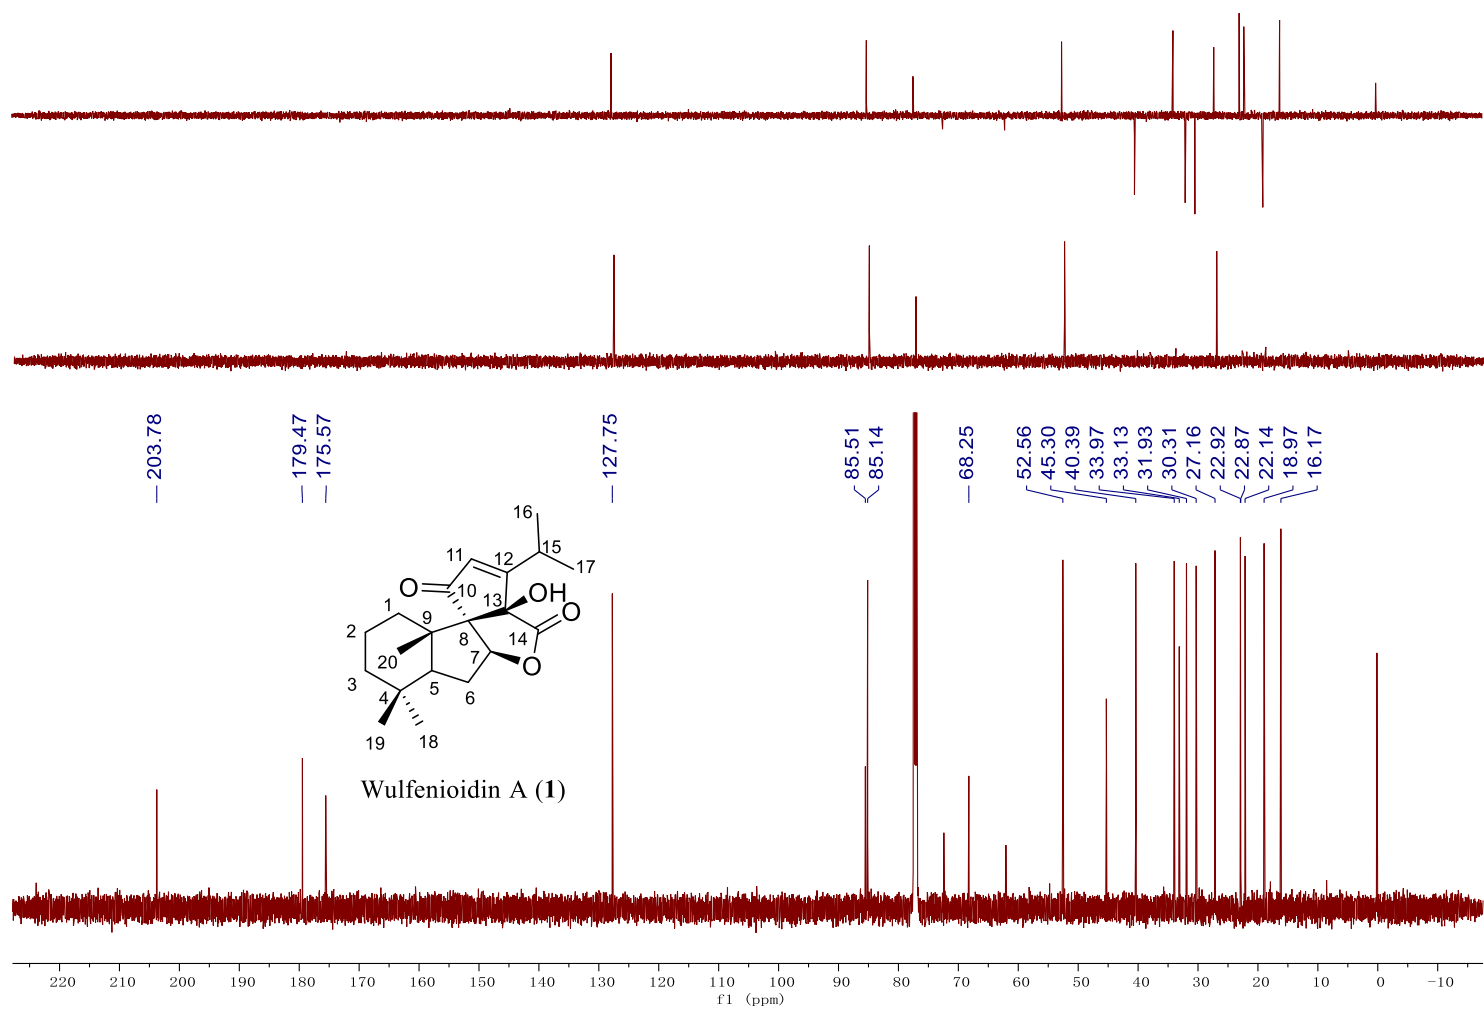

**Figure S8.** <sup>13</sup>C and DEPT NMR spectra of wulfenioidin A (1) in chloroform (150 MHz)

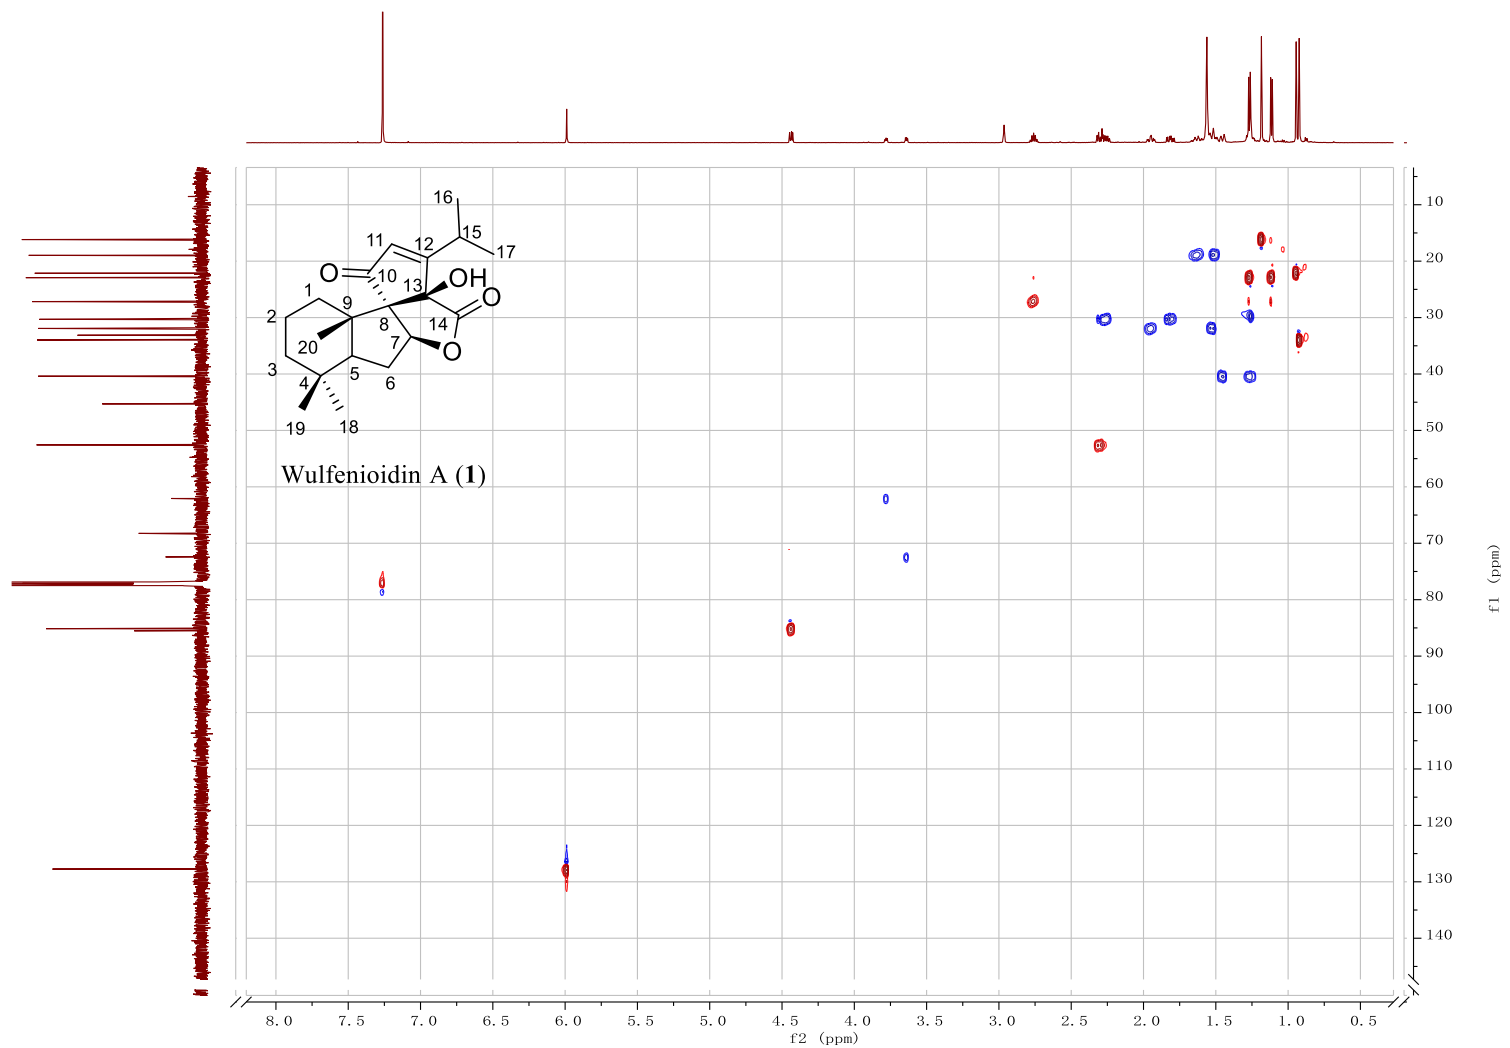

Figure S9. HSQC spectrum of wulfenioidin A (1) in chloroform (600 MHz)

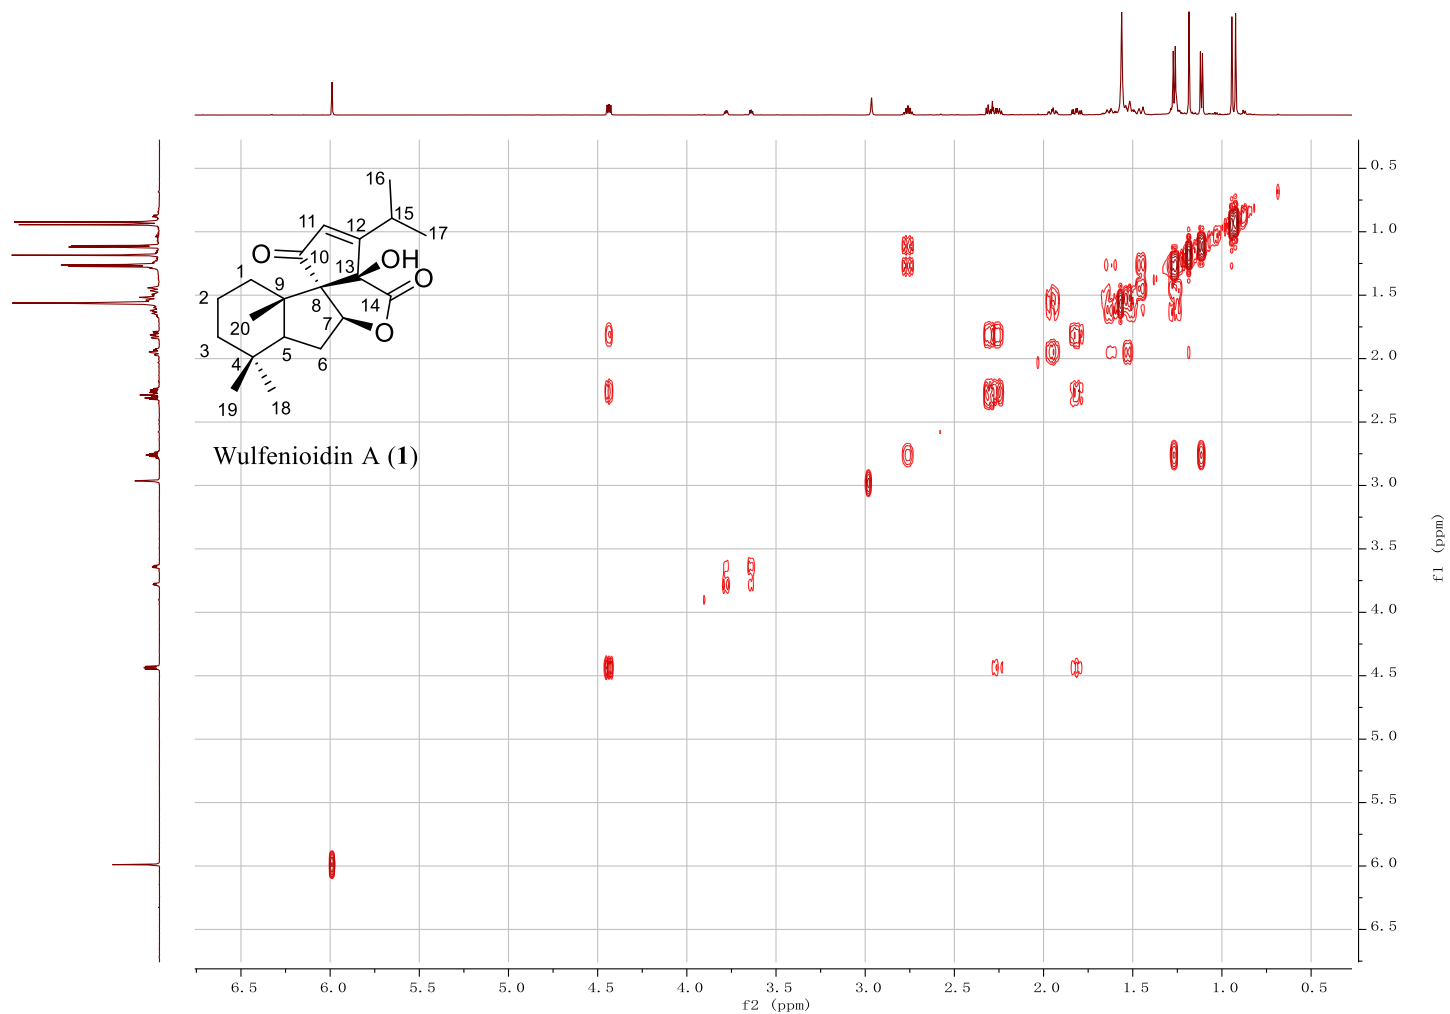

**Figure S10.**  $^1\text{H}$ - $^1\text{H}$  COSY spectrum of wulfenioidin A (1) in chloroform (600 MHz)

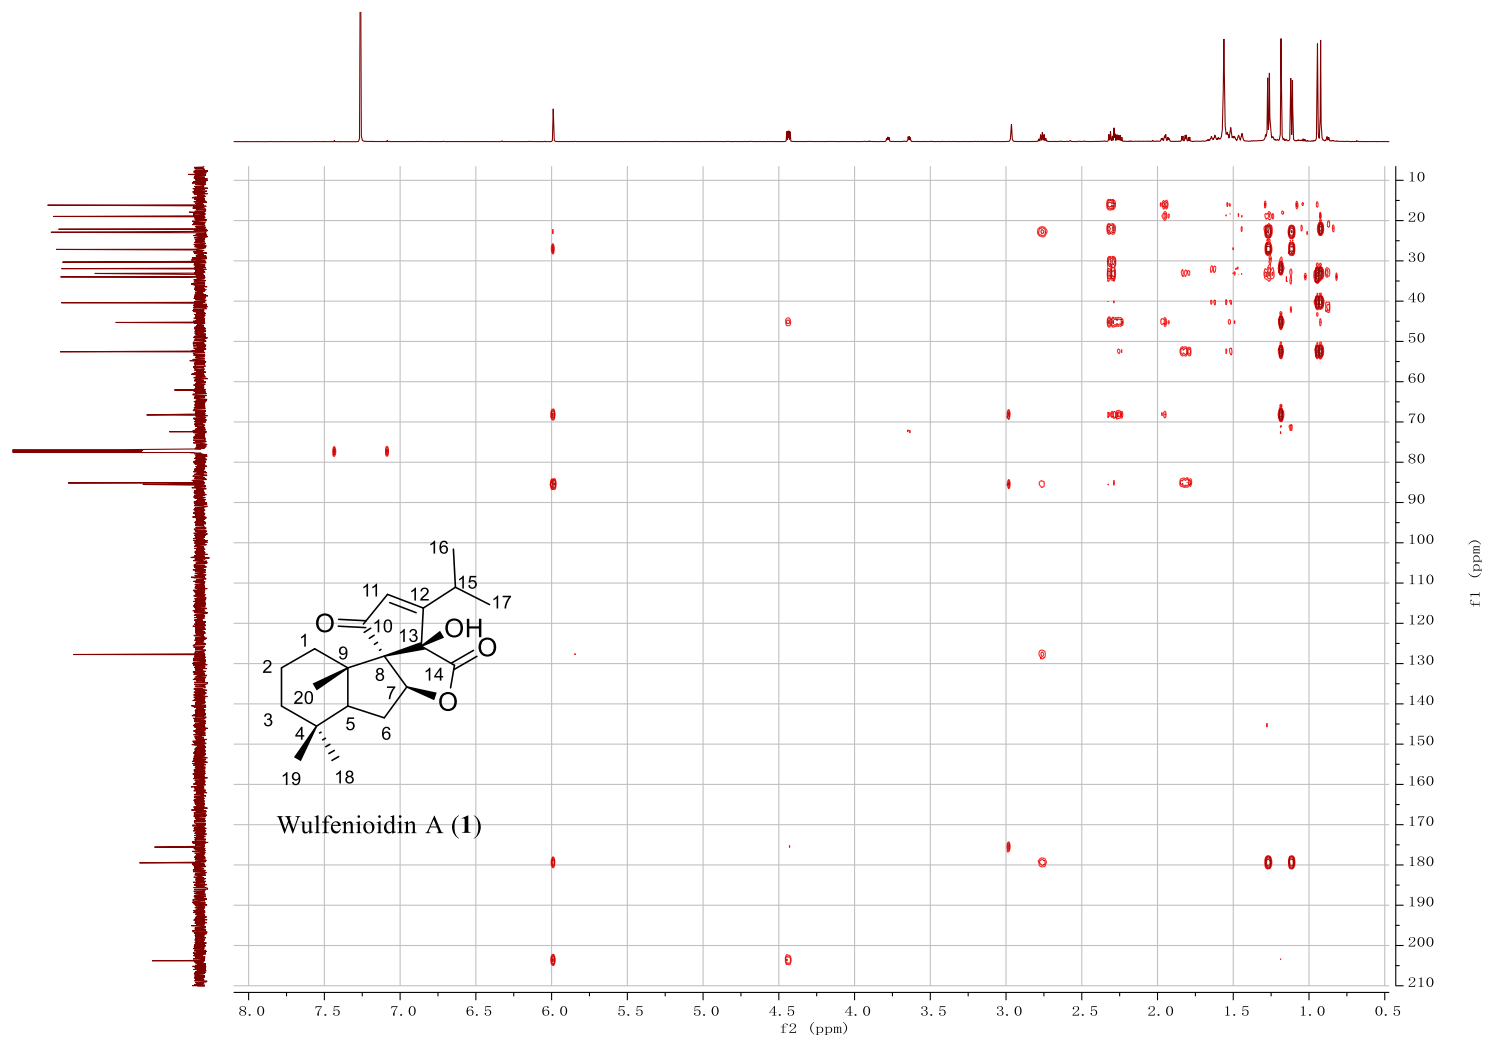

Figure S11. HMBC spectrum of wulfenioidin A (1) in chloroform (600 MHz)

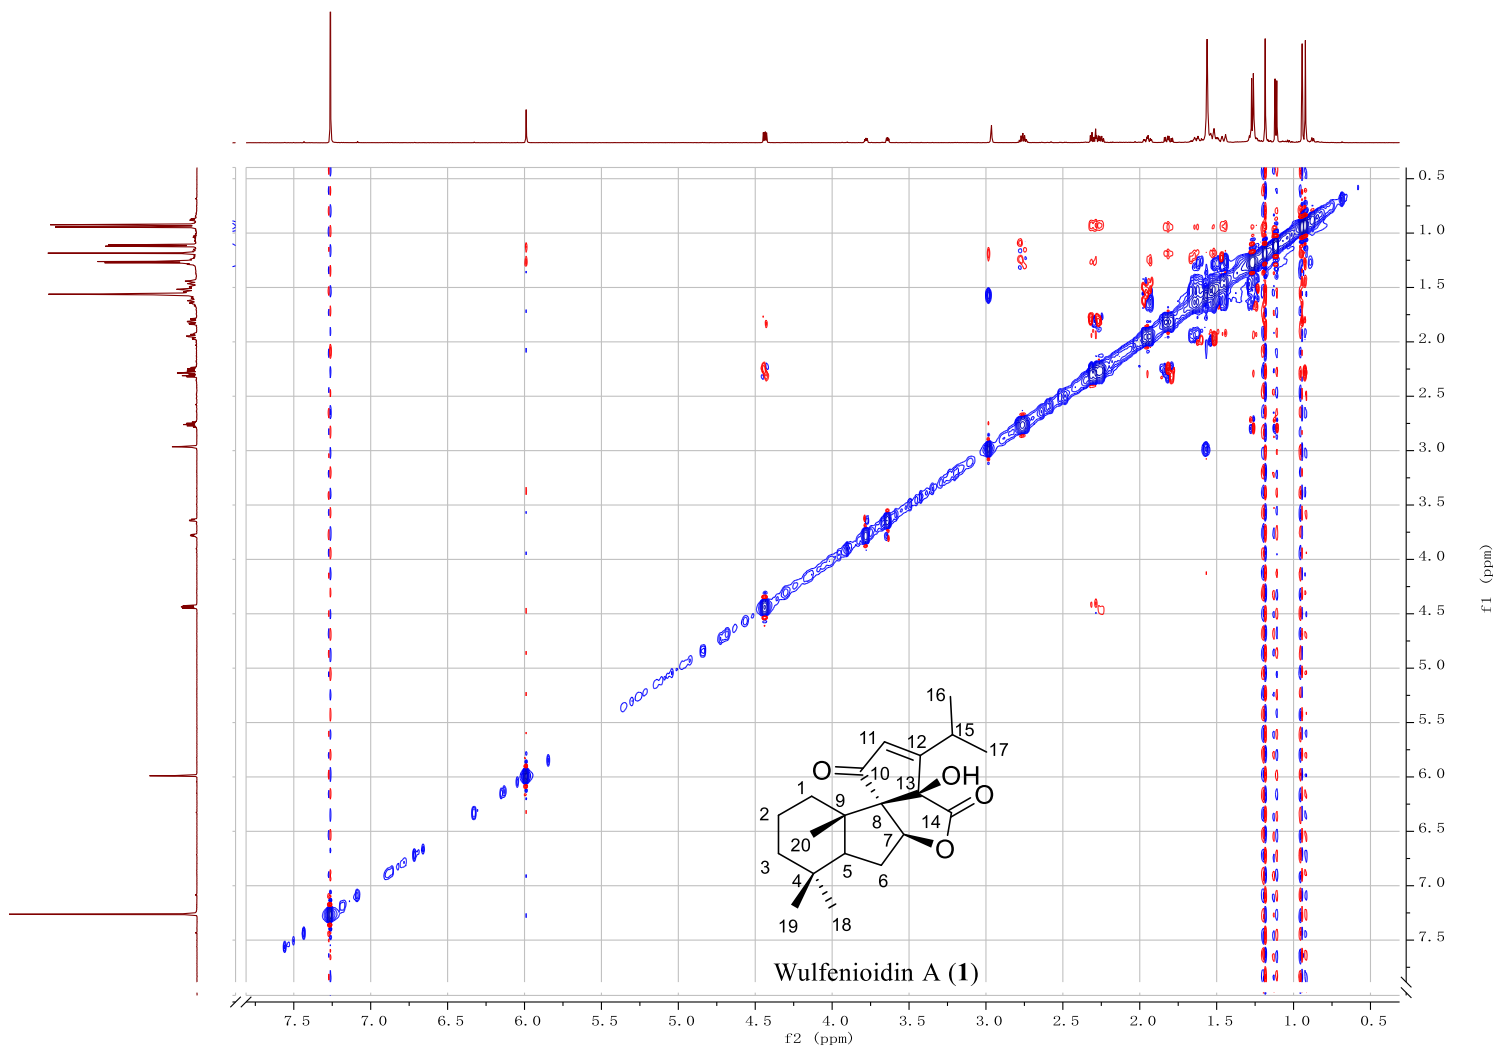

Figure S12. ROESY spectrum of wulfenioidin A (1) in chloroform (600 MHz)

JJS-47-87-17 #47 RT: 1.01 AV: 1 NL: 6.66E6  
T: FTMS + c ESI Full ms [100.00-700.00]

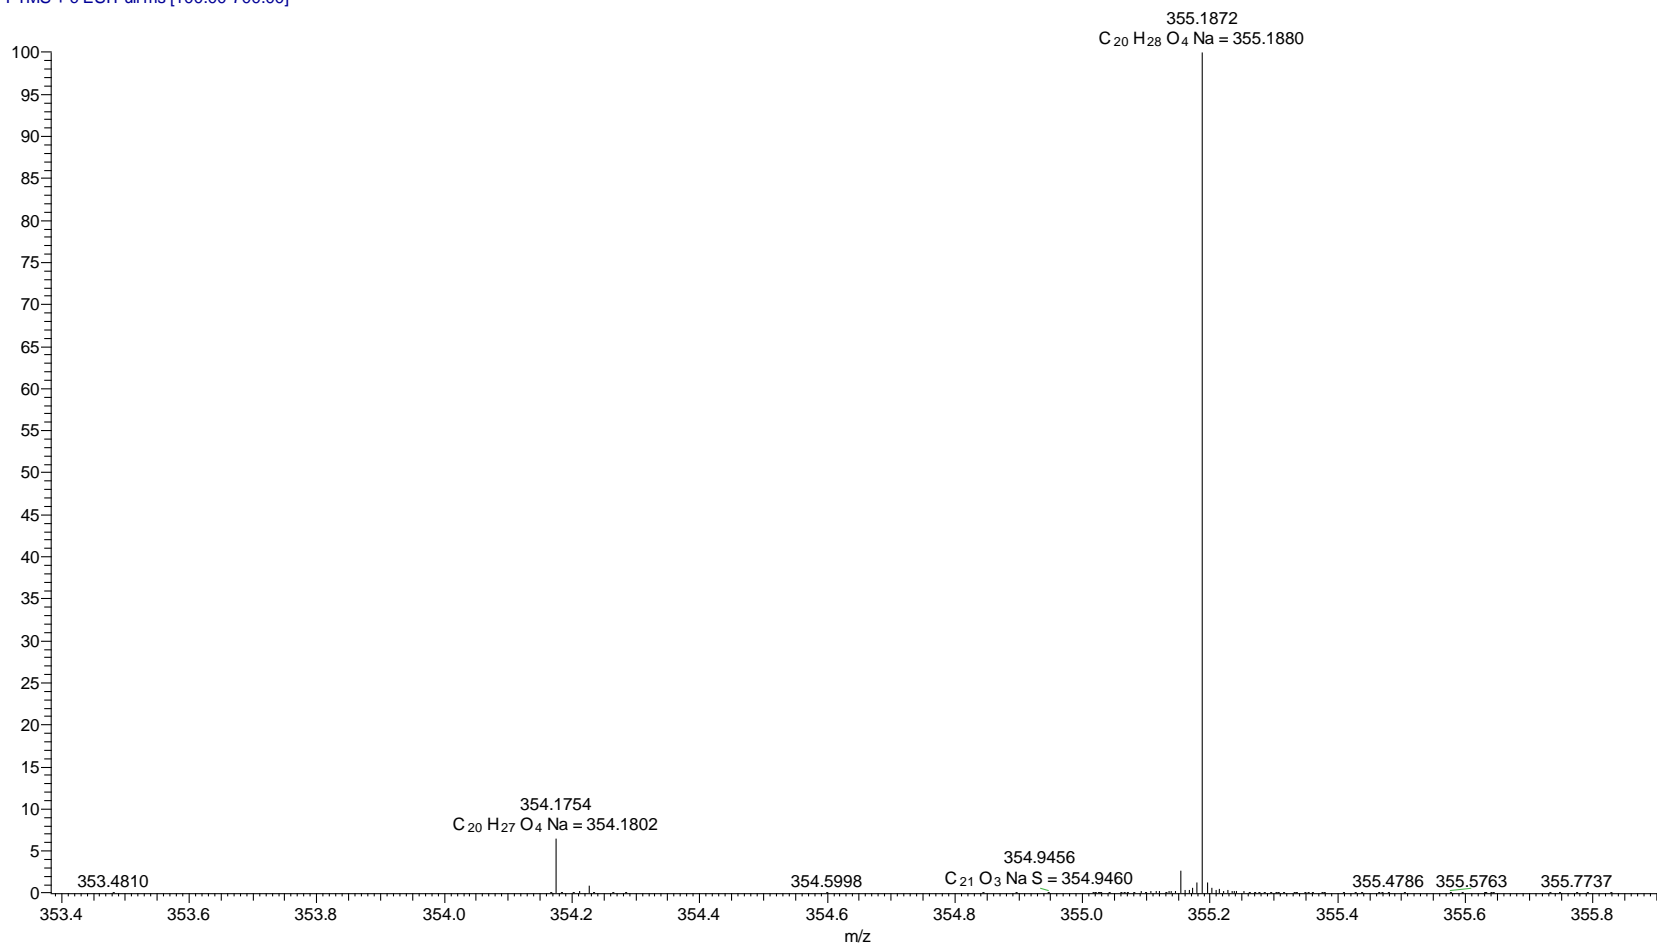

Figure S13. HRESIMS spectrum of wulfenioidin A (1)

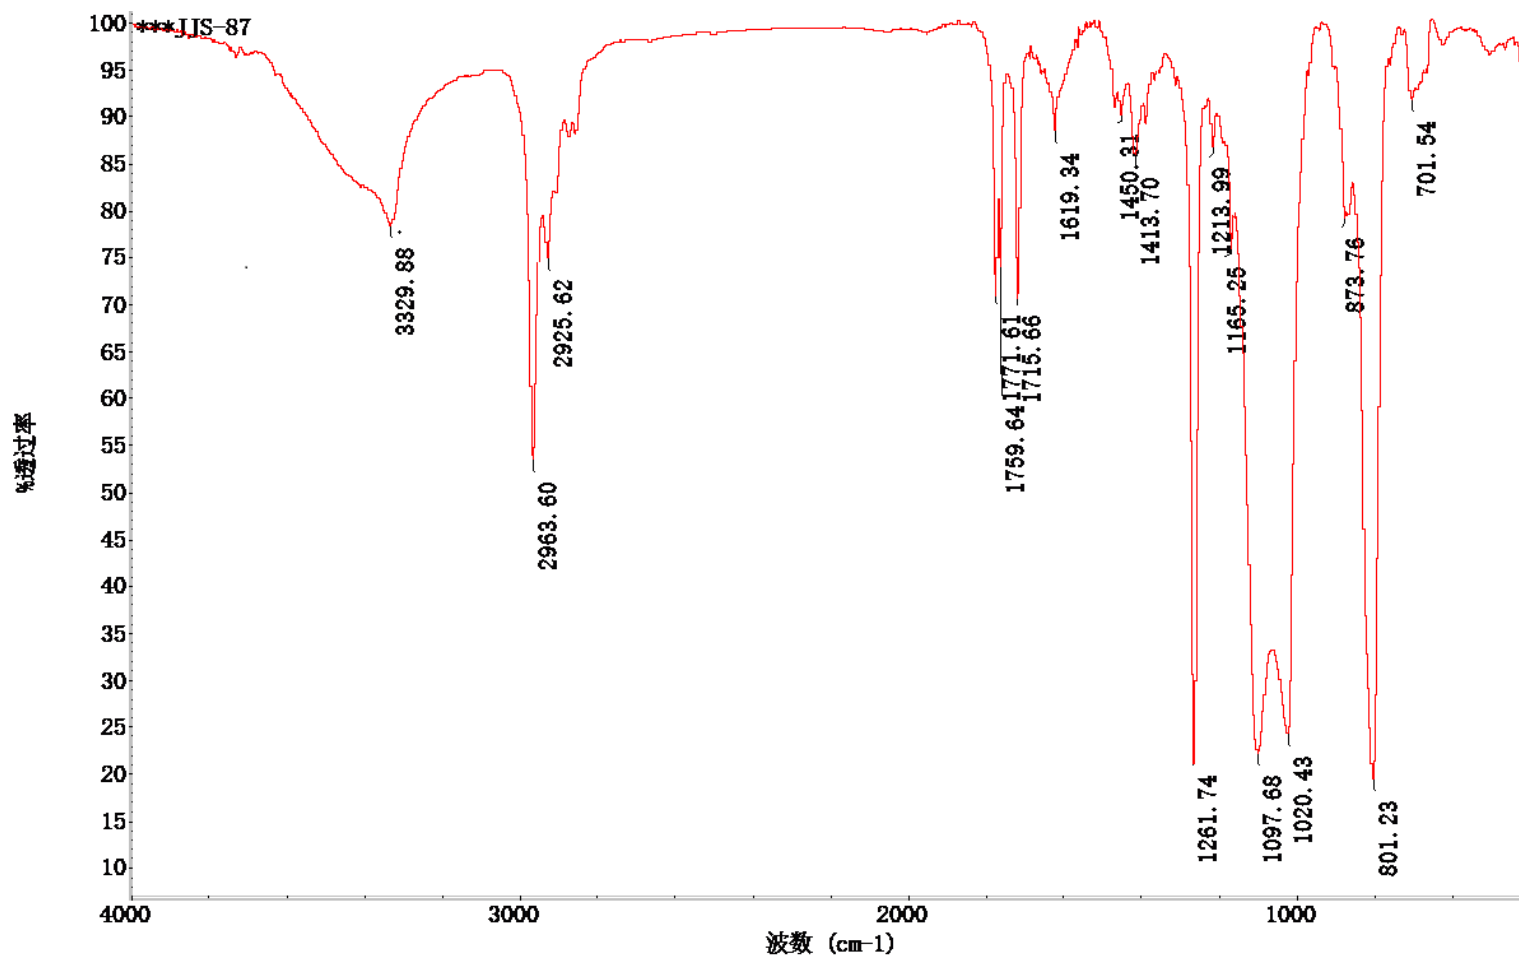

Figure S14. IR spectrum of wulfenioidin A (1)



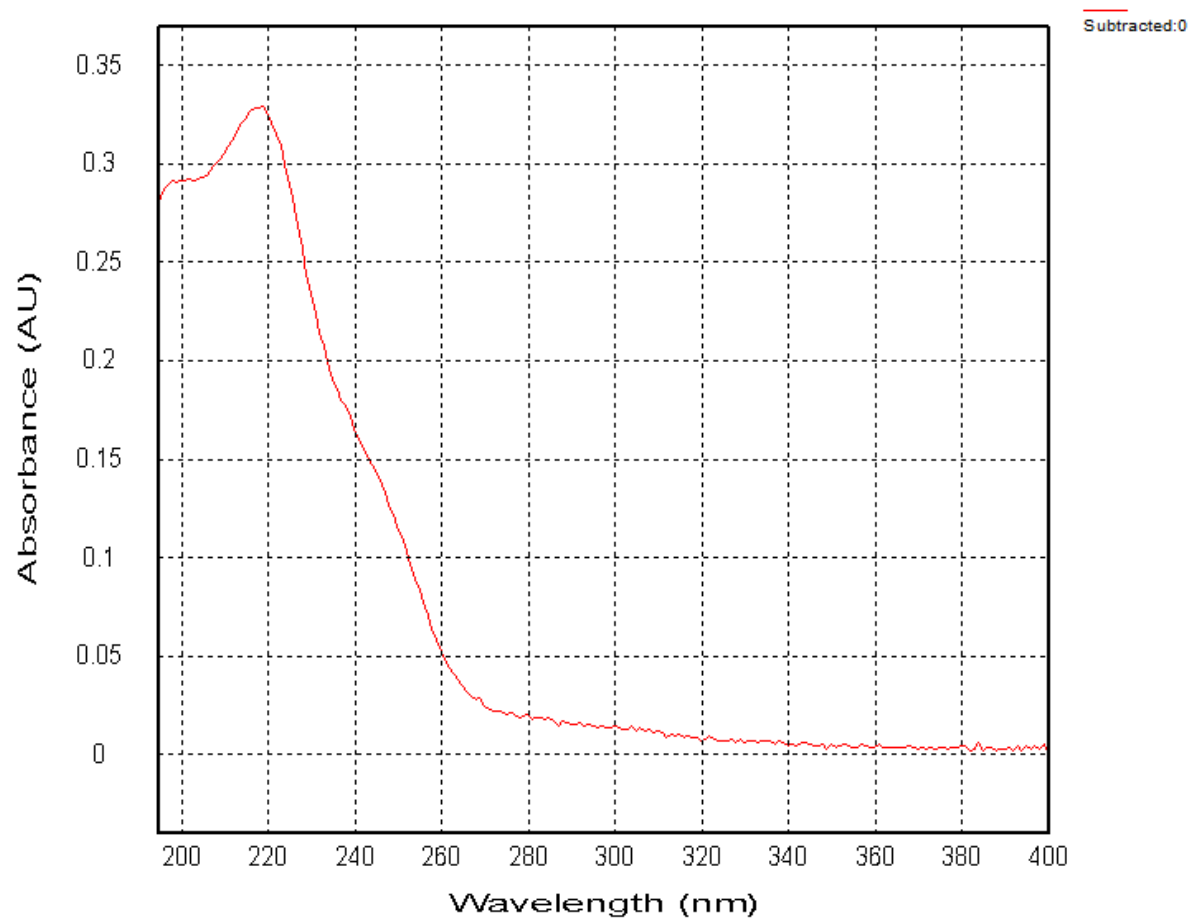

**Figure S15.** UV spectrum of wulfenioidin A (1)

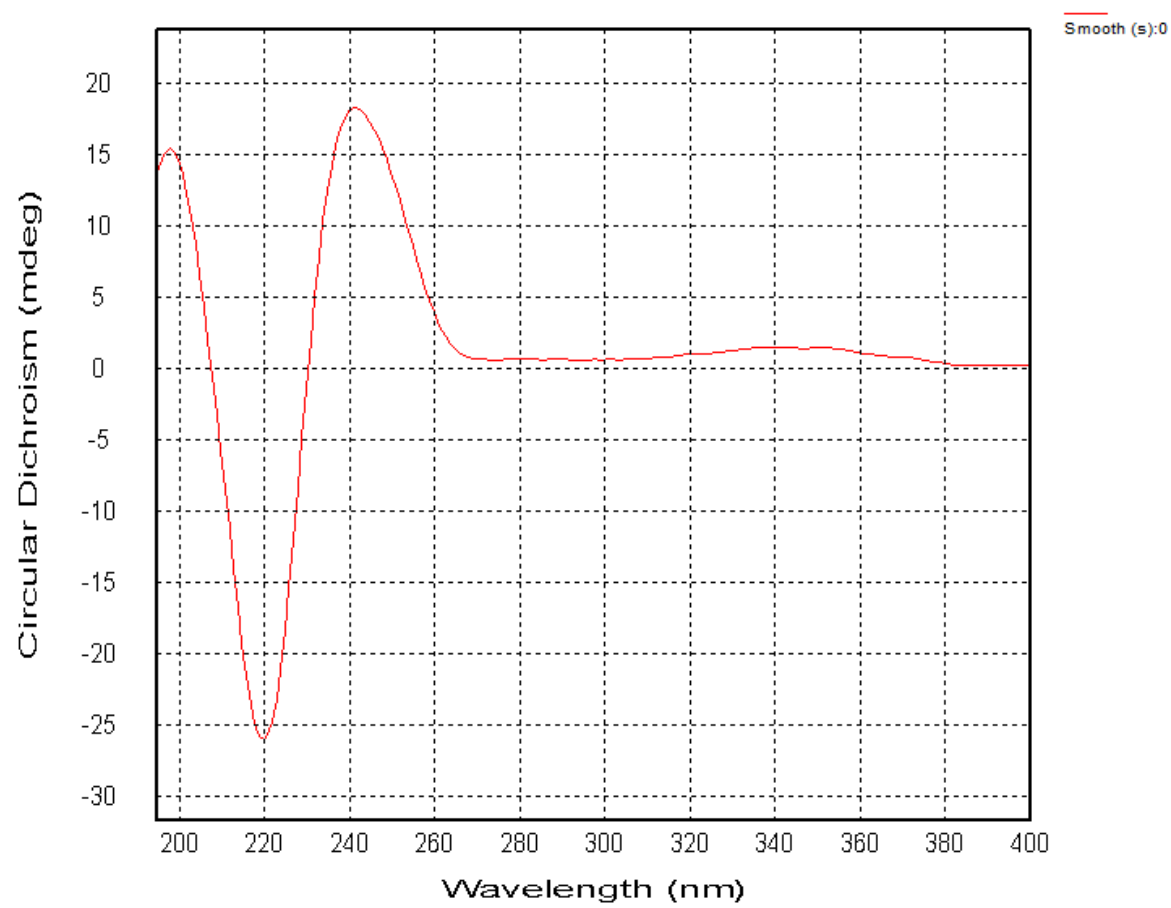

**Figure S16.** CD spectrum of wulfenioidin A (1)

### **Rudolph Research Analytical**

This sample was measured on an Autopol VI, Serial #91058  
Manufactured by Rudolph Research Analytical, Hackettstown, NJ, USA.

Measurement Date : Thursday, 21-JUL-2022

Set Temperature : OFF

Time Delay : Disabled

Delay between Measurement : Disabled

| <u>n</u>    | <u>Average</u>   | <u>Std.Dev.</u> | <u>% RSD</u>  | <u>Maximum</u> | <u>Minimum</u> |               |              |                     |              |  |
|-------------|------------------|-----------------|---------------|----------------|----------------|---------------|--------------|---------------------|--------------|--|
| 5           | 46.20            | 0.45            | 0.97          | 47.00          | 46.00          |               |              |                     |              |  |
| <u>S.No</u> | <u>Sample ID</u> | <u>Time</u>     | <u>Result</u> | <u>Scale</u>   | <u>OR °Arc</u> | <u>WLG.nm</u> | <u>Lg.mm</u> | <u>Conc.g/100ml</u> | <u>Temp.</u> |  |
| 1           | jjs-87           | 03:37:26 PM     | 46.00         | SR             | 0.046          | 589           | 100.00       | 0.100               | 25.6         |  |
| 2           | jjs-87           | 03:37:33 PM     | 46.00         | SR             | 0.046          | 589           | 100.00       | 0.100               | 25.6         |  |
| 3           | jjs-87           | 03:37:39 PM     | 47.00         | SR             | 0.047          | 589           | 100.00       | 0.100               | 25.6         |  |
| 4           | jjs-87           | 03:37:45 PM     | 46.00         | SR             | 0.046          | 589           | 100.00       | 0.100               | 25.6         |  |
| 5           | jjs-87           | 03:37:51 PM     | 46.00         | SR             | 0.046          | 589           | 100.00       | 0.100               | 25.6         |  |

**Figure S17. OR report of wulfenioidin A (1)**

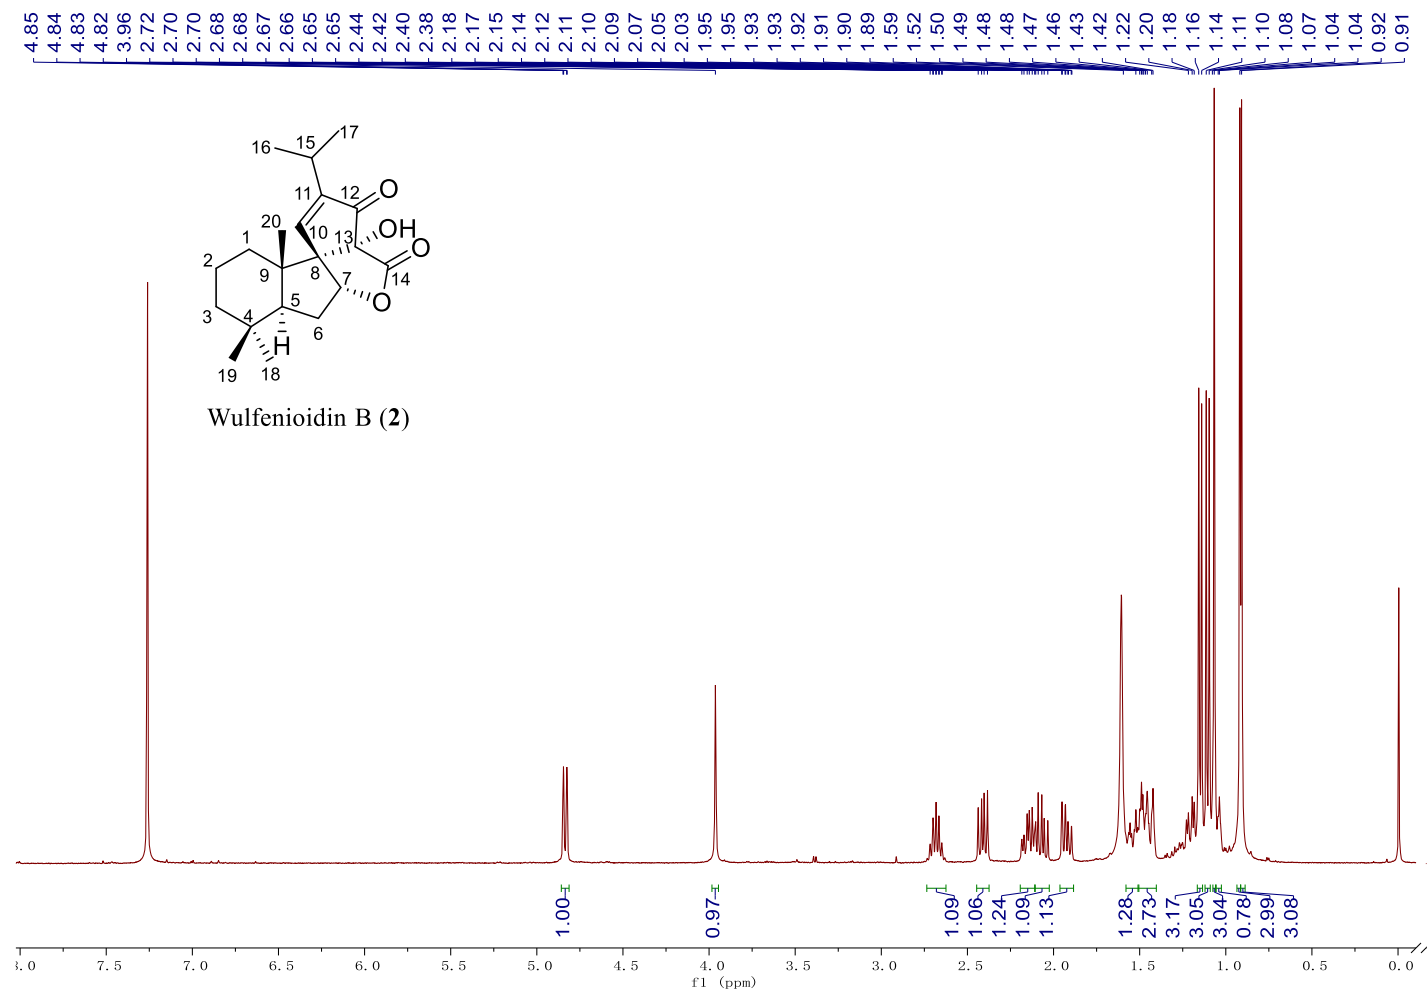

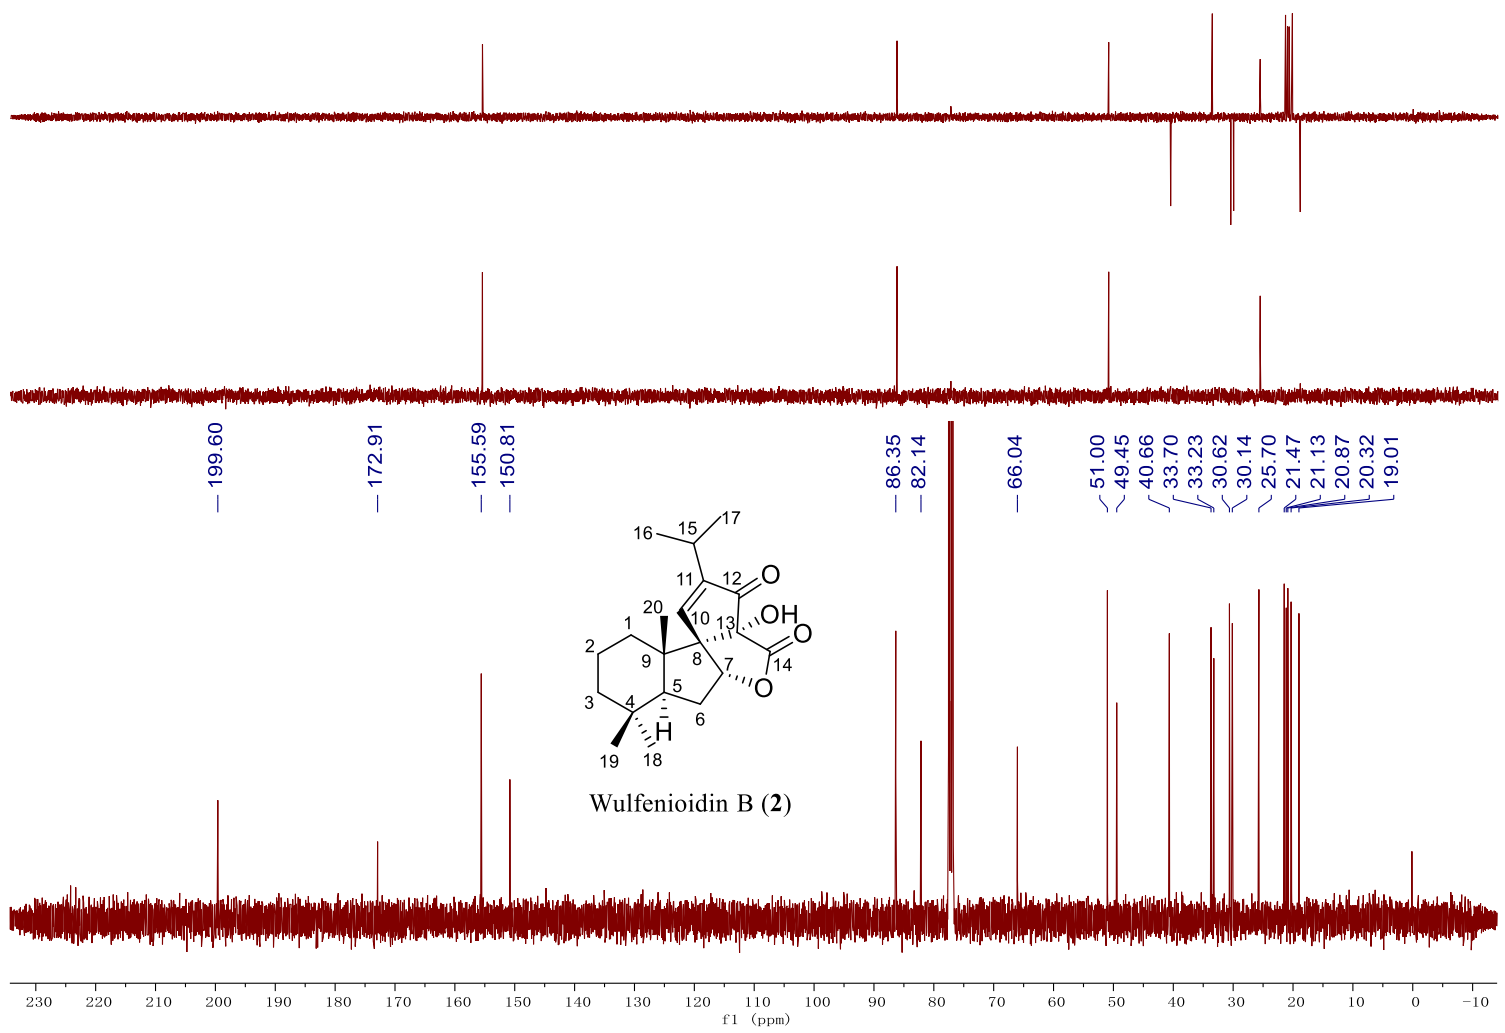

**Figure S19.** <sup>13</sup>C and DEPT NMR spectra of wulfenioidin **B (2)** in chloroform (100 MHz)

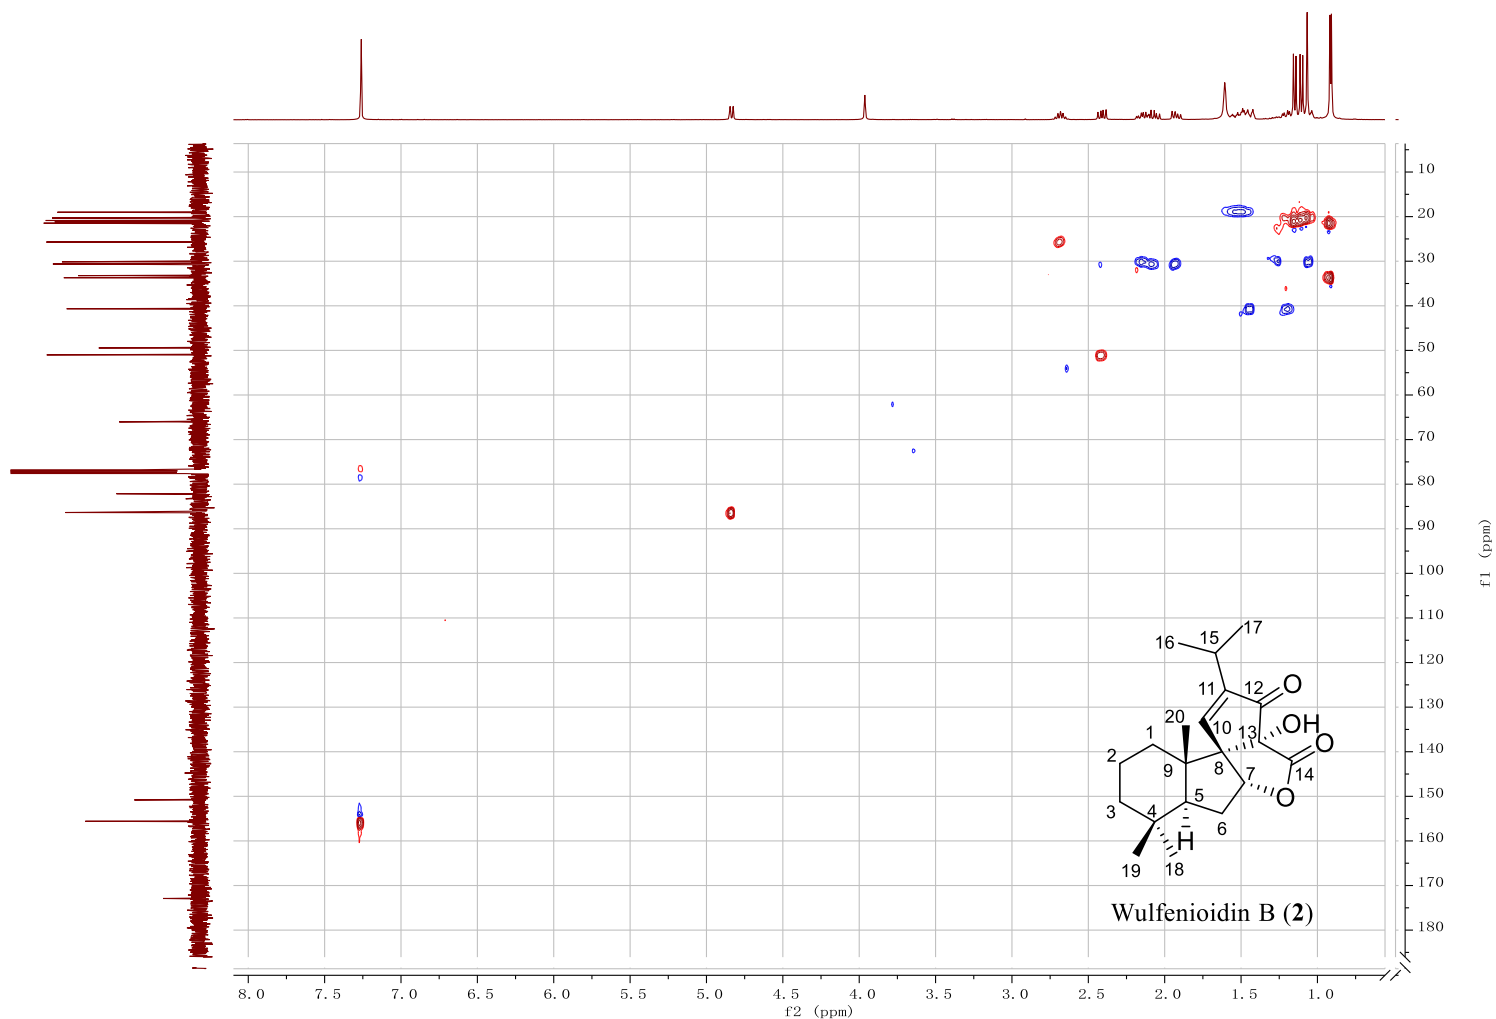

**Figure S20.** HSQC spectrum of wulfenioidin **B** (2) in chloroform (600 MHz)

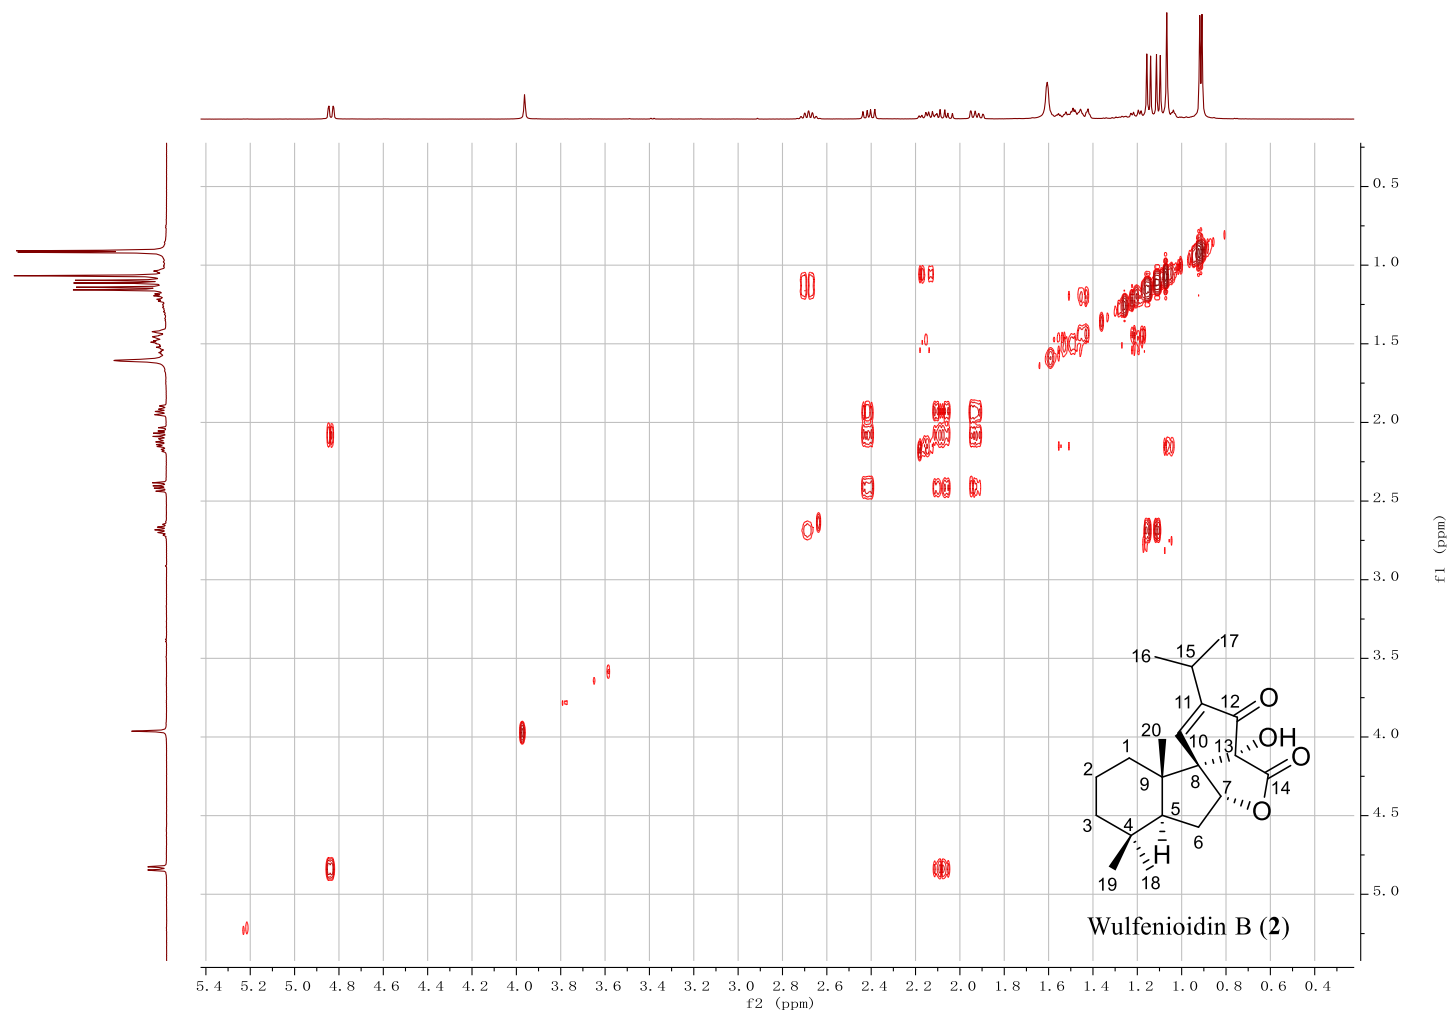

Figure S21.  $^1\text{H}$ - $^1\text{H}$  COSY spectrum of wulfenioidin B (2) in chloroform (600 MHz)

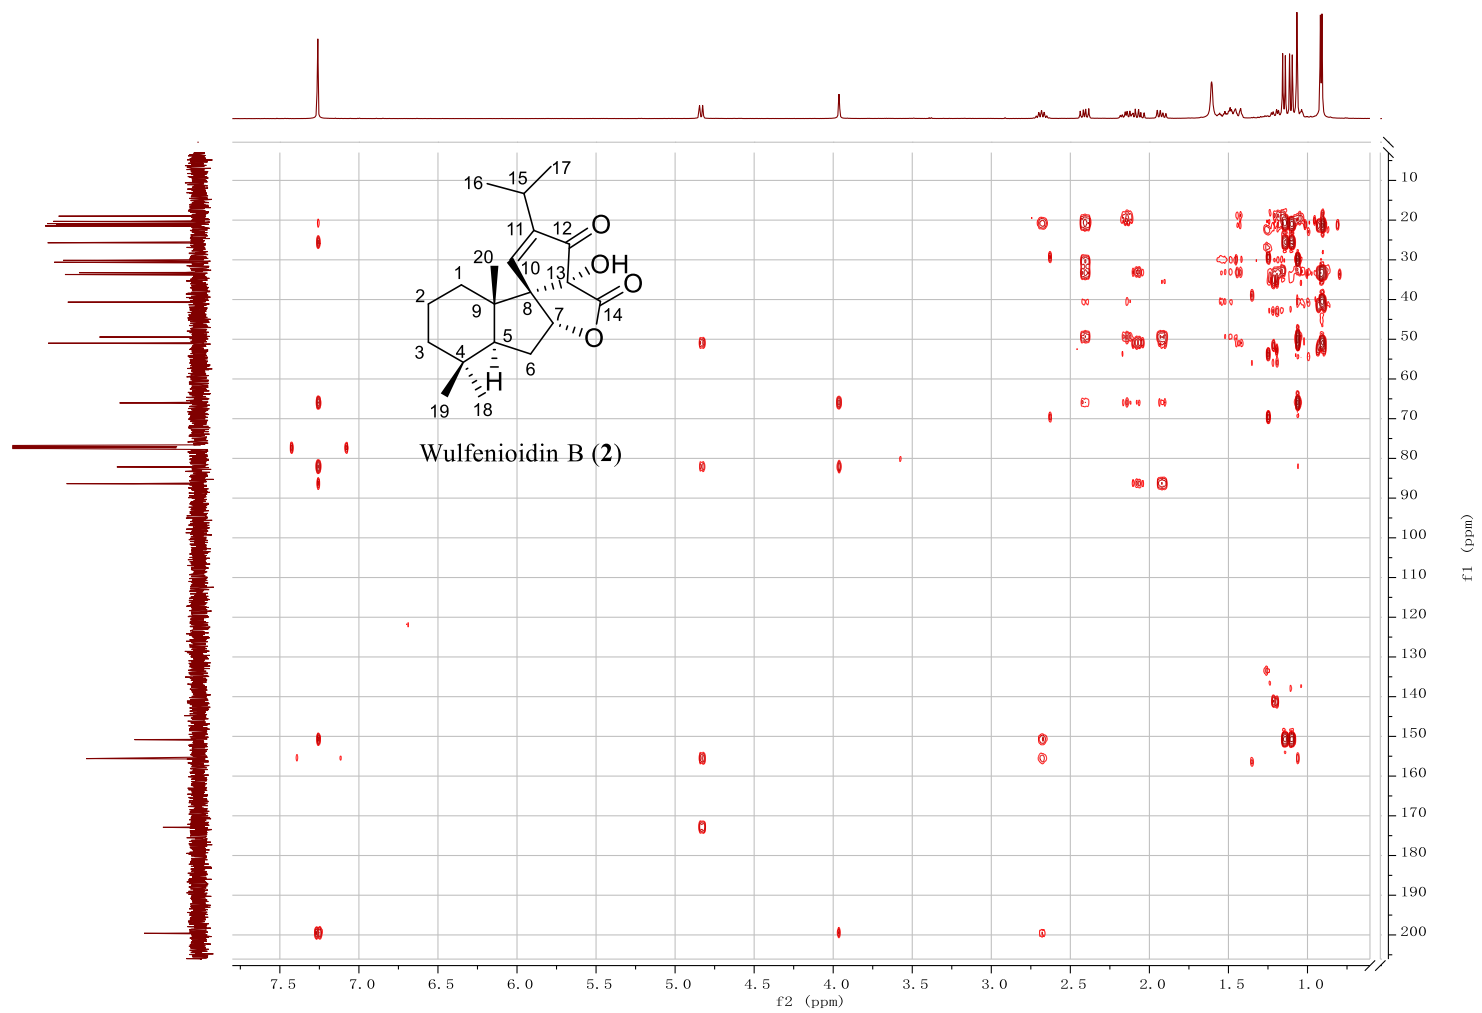

Figure S22. HMBC spectrum of wulfenioidin B (2) in chloroform (600 MHz)



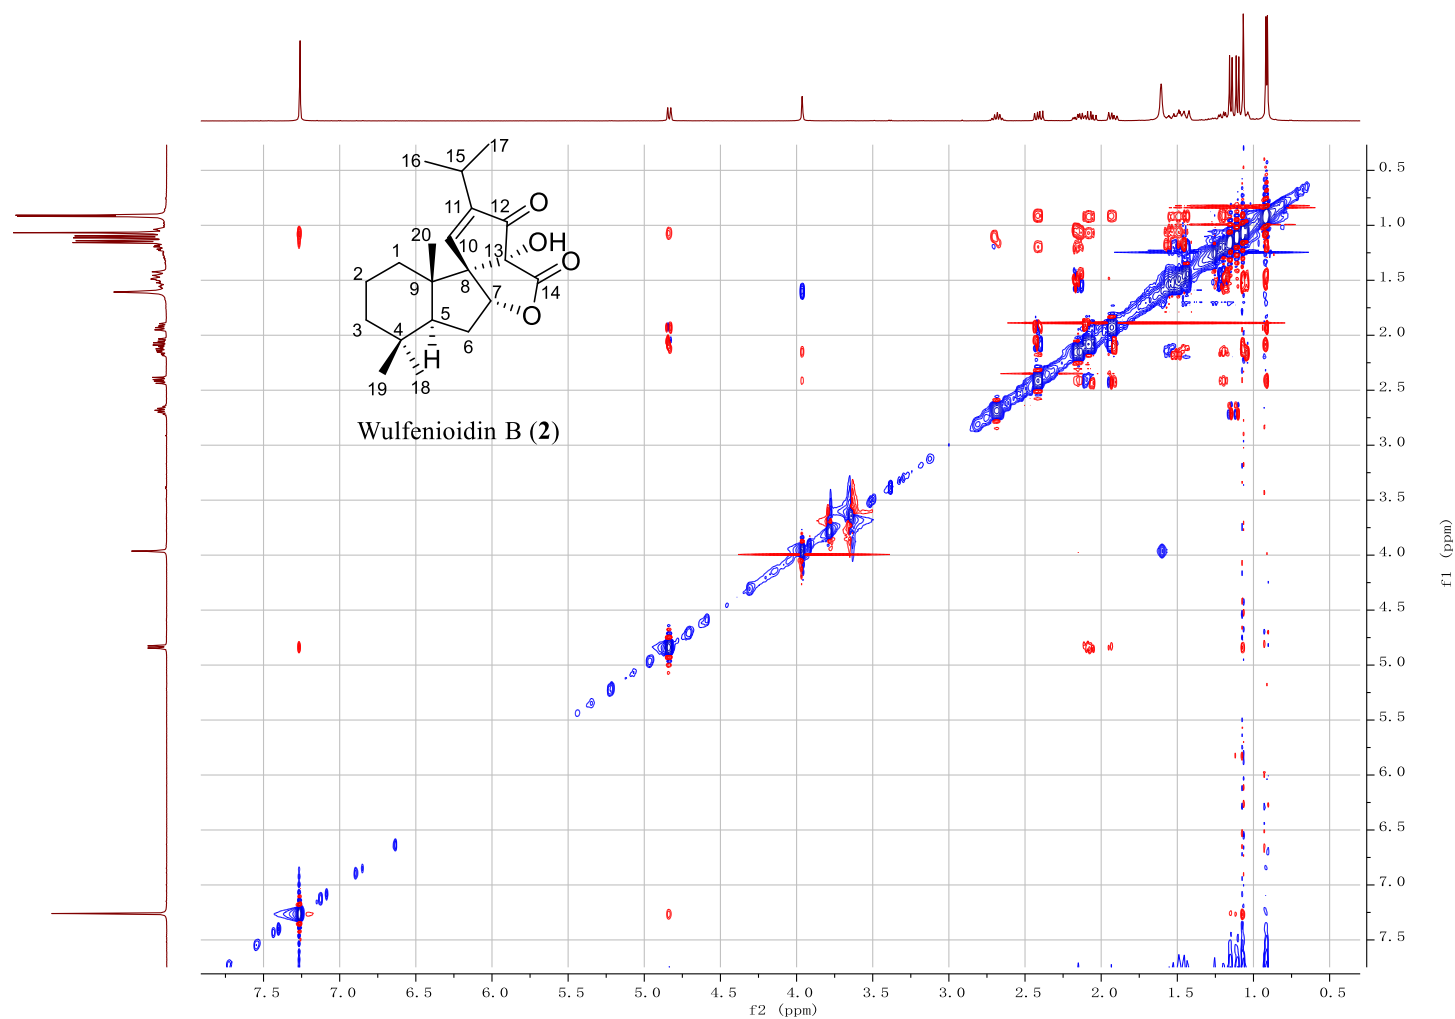

Figure S23. ROESY spectrum of wulfenioidin B (2) in chloroform (600 MHz)

JJS-47-87-14 #48 RT: 1.02 AV: 1 NL: 1.11E7  
T: FTMS + c ESI Full ms [100.00-700.00]

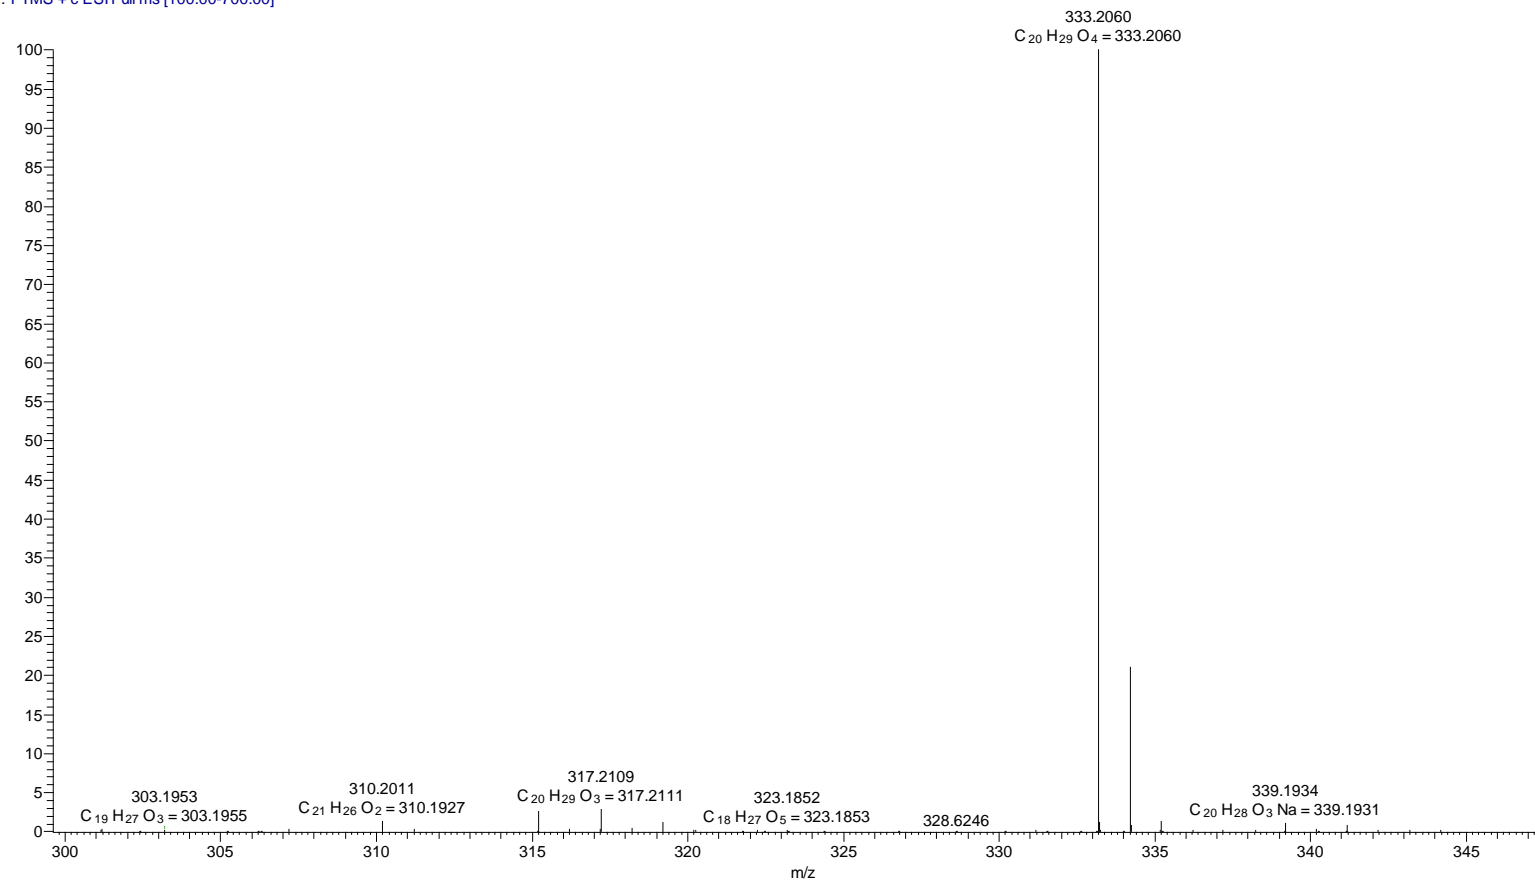

Figure S24. HRESIMS spectrum of wulfenioidin **B** (2)

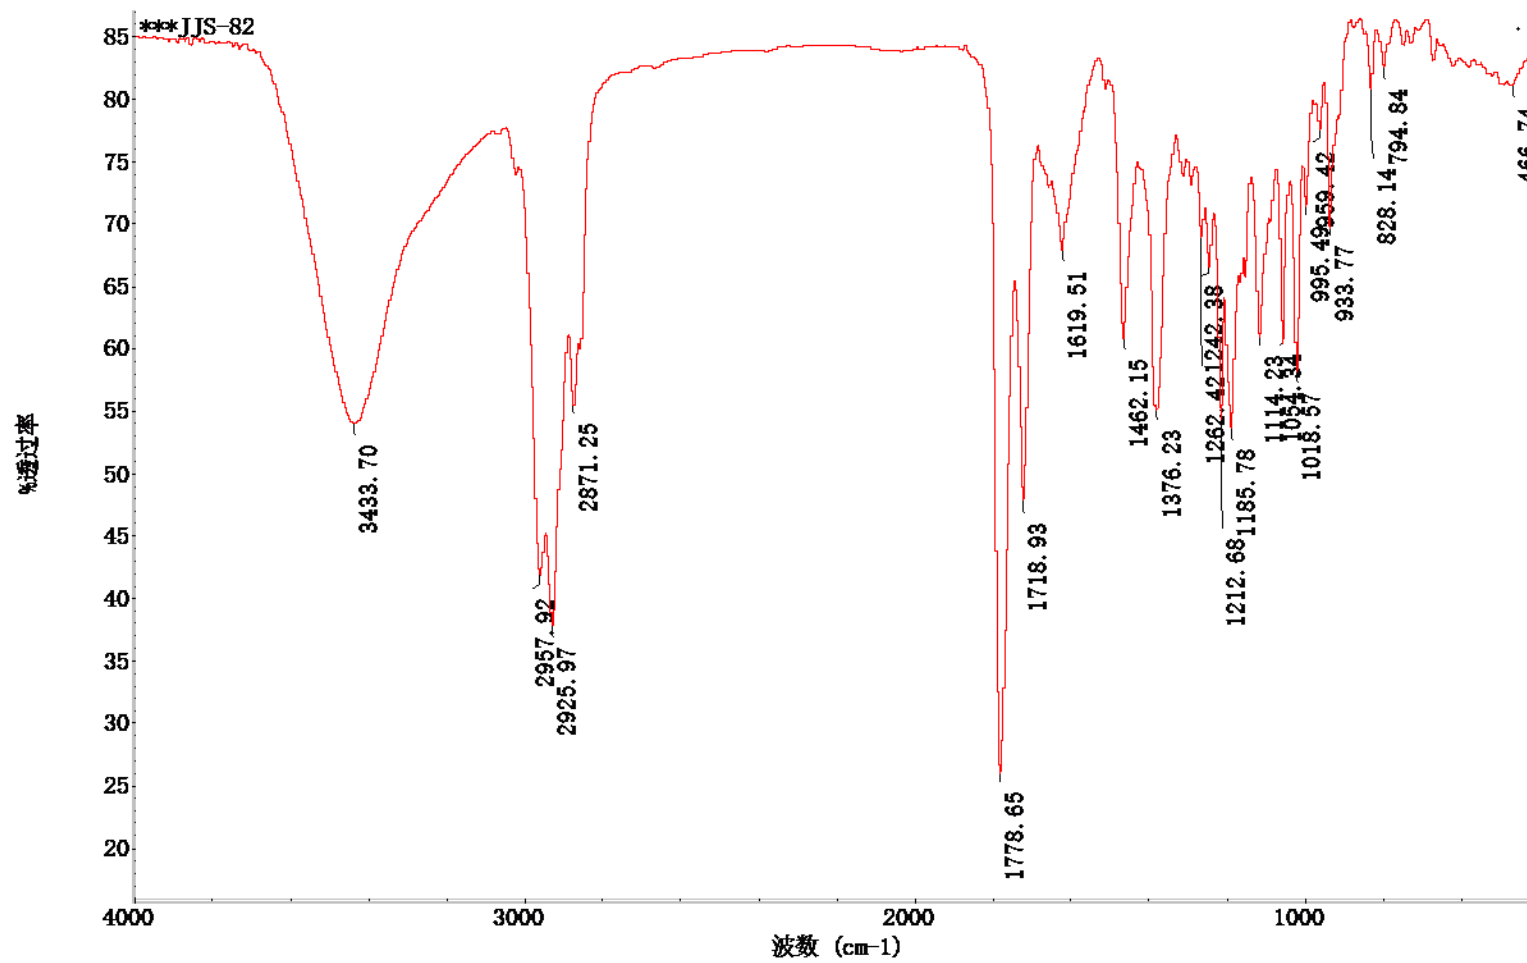

Figure S25. IR spectrum of wulfenioidin B (2)

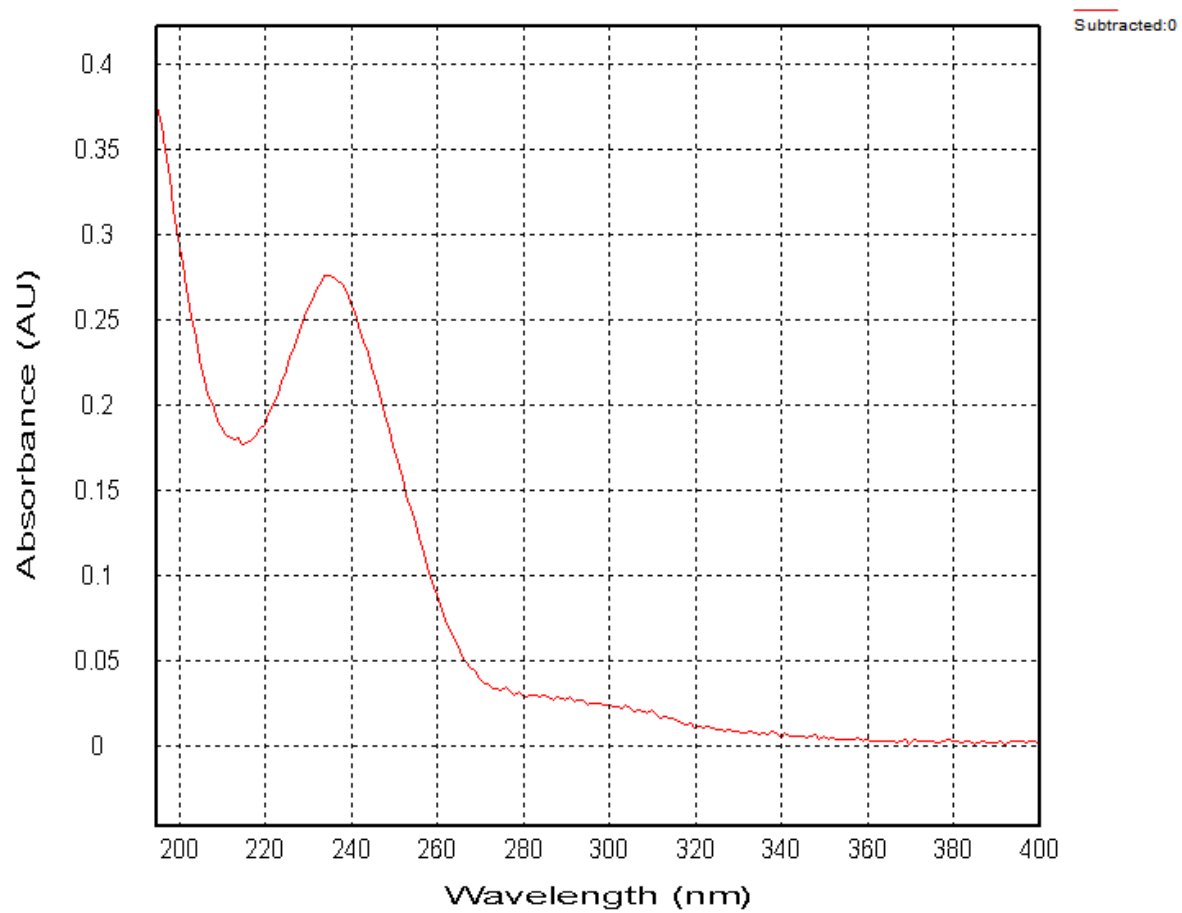

Figure S26. UV spectrum of wulfenioidin **B** (2)

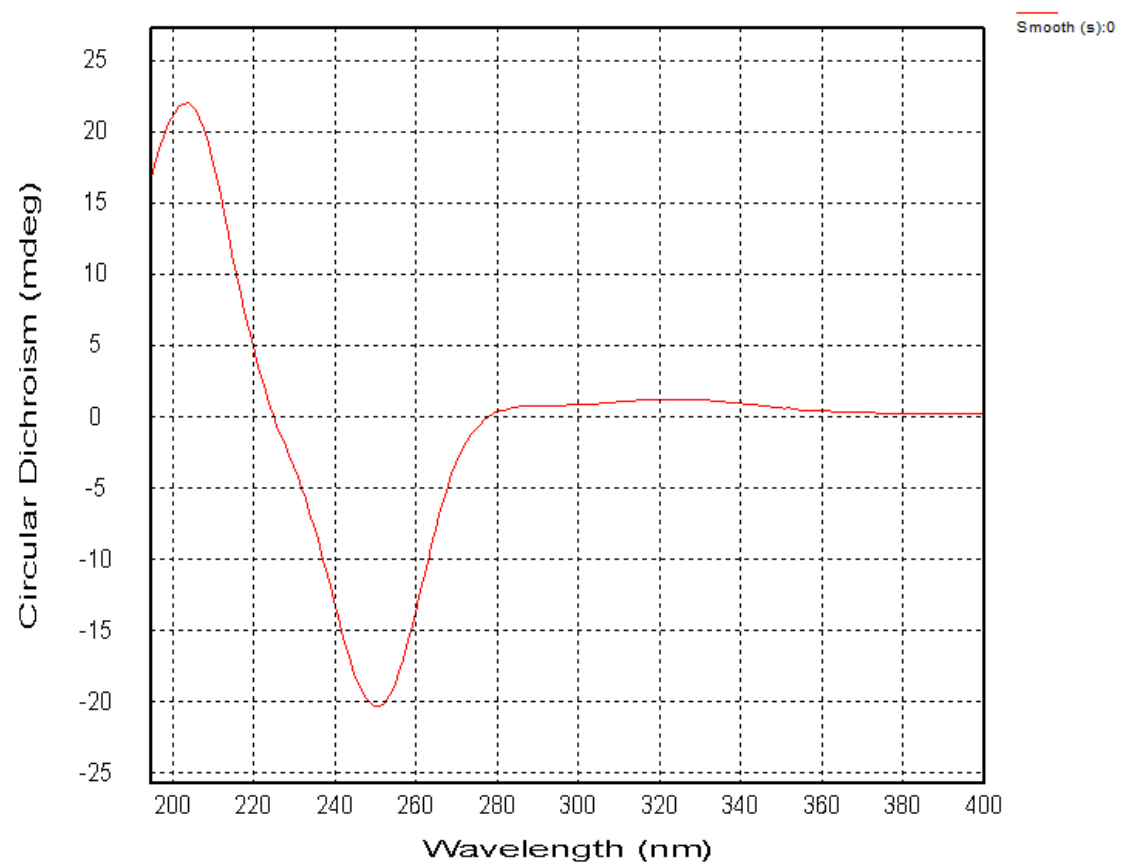

**Figure S27.** CD spectrum of wulfenioidin **B (2)**

### **Rudolph Research Analytical**

This sample was measured on an Autopol VI, Serial #91058  
Manufactured by Rudolph Research Analytical, Hackettstown, NJ, USA.

Measurement Date : Thursday, 21-JUL-2022

Set Temperature : OFF

Time Delay : Disabled

Delay between Measurement : Disabled

| <b><u>n</u></b>    | <b><u>Average</u></b>   | <b><u>Std.Dev.</u></b> | <b><u>% RSD</u></b>  | <b><u>Maximum</u></b> | <b><u>Minimum</u></b> |                      |                     |                            |                     |  |
|--------------------|-------------------------|------------------------|----------------------|-----------------------|-----------------------|----------------------|---------------------|----------------------------|---------------------|--|
| 5                  | -54.00                  | 0.00                   | 0.00                 | -54.00                | -54.00                |                      |                     |                            |                     |  |
| <b><u>S.No</u></b> | <b><u>Sample ID</u></b> | <b><u>Time</u></b>     | <b><u>Result</u></b> | <b><u>Scale</u></b>   | <b><u>OR °Arc</u></b> | <b><u>WLG.nm</u></b> | <b><u>Lq.mm</u></b> | <b><u>Conc.q/100ml</u></b> | <b><u>Temp.</u></b> |  |
| 1                  | jjs-82                  | 03:30:07 PM            | -54.00               | SR                    | -0.081                | 589                  | 100.00              | 0.150                      | 25.4                |  |
| 2                  | jjs-82                  | 03:30:13 PM            | -54.00               | SR                    | -0.081                | 589                  | 100.00              | 0.150                      | 25.4                |  |
| 3                  | jjs-82                  | 03:30:19 PM            | -54.00               | SR                    | -0.081                | 589                  | 100.00              | 0.150                      | 25.4                |  |
| 4                  | jjs-82                  | 03:30:25 PM            | -54.00               | SR                    | -0.081                | 589                  | 100.00              | 0.150                      | 25.4                |  |
| 5                  | jjs-82                  | 03:30:30 PM            | -54.00               | SR                    | -0.081                | 589                  | 100.00              | 0.150                      | 25.4                |  |

**Figure S28.** OR report of wulfenioidin **B** (2)

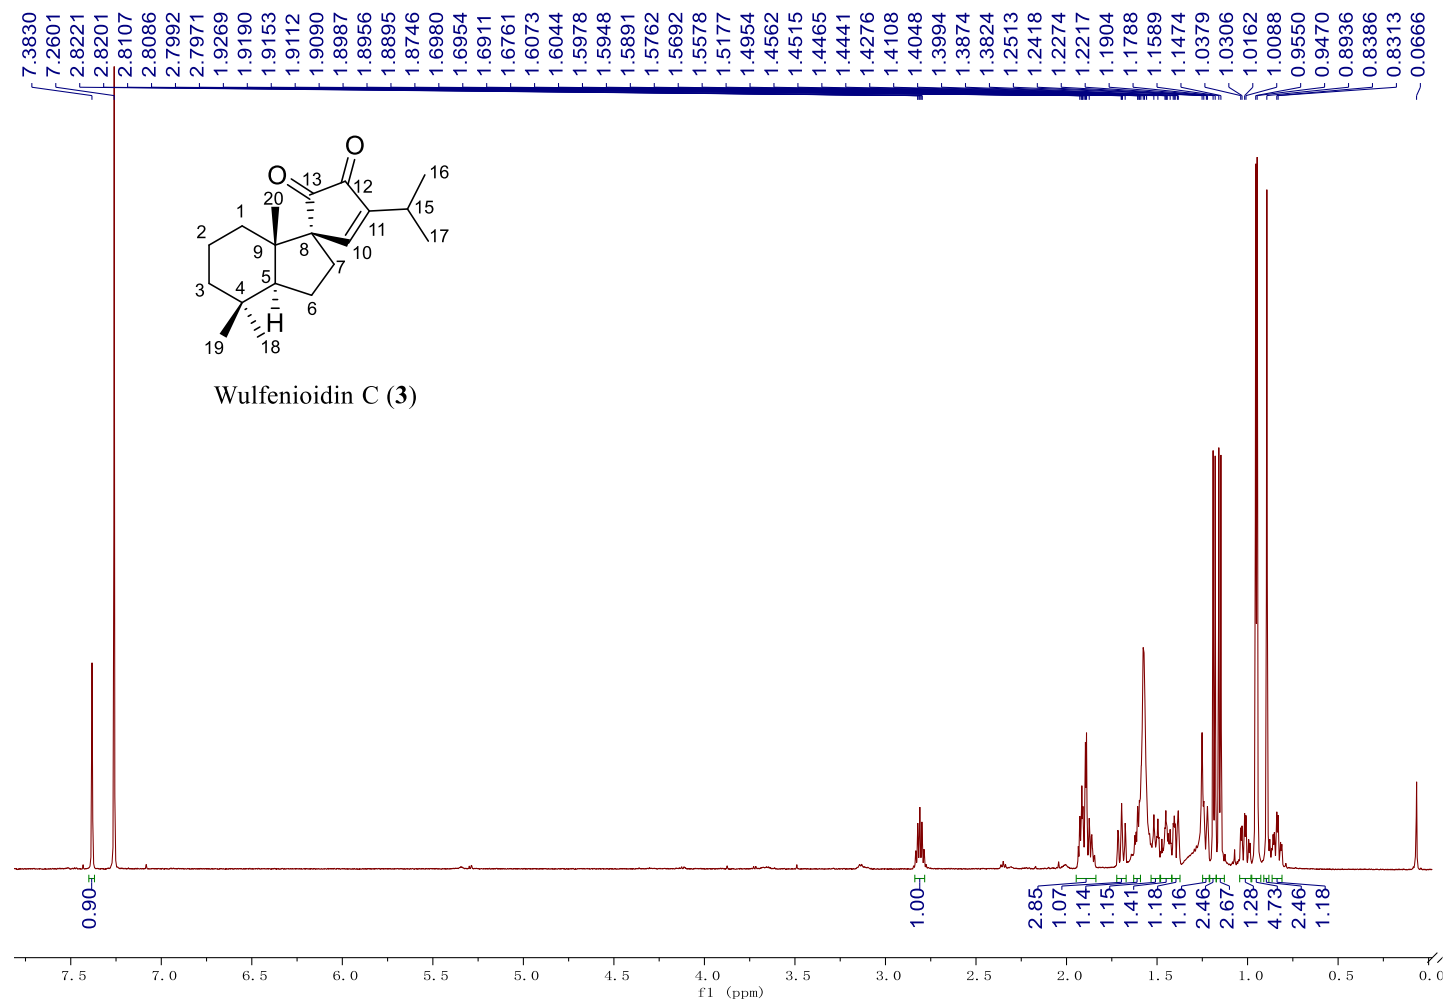

Figure S29. <sup>1</sup>H NMR spectrum of wulfenioidin C (3) in chloroform (600 MHz)

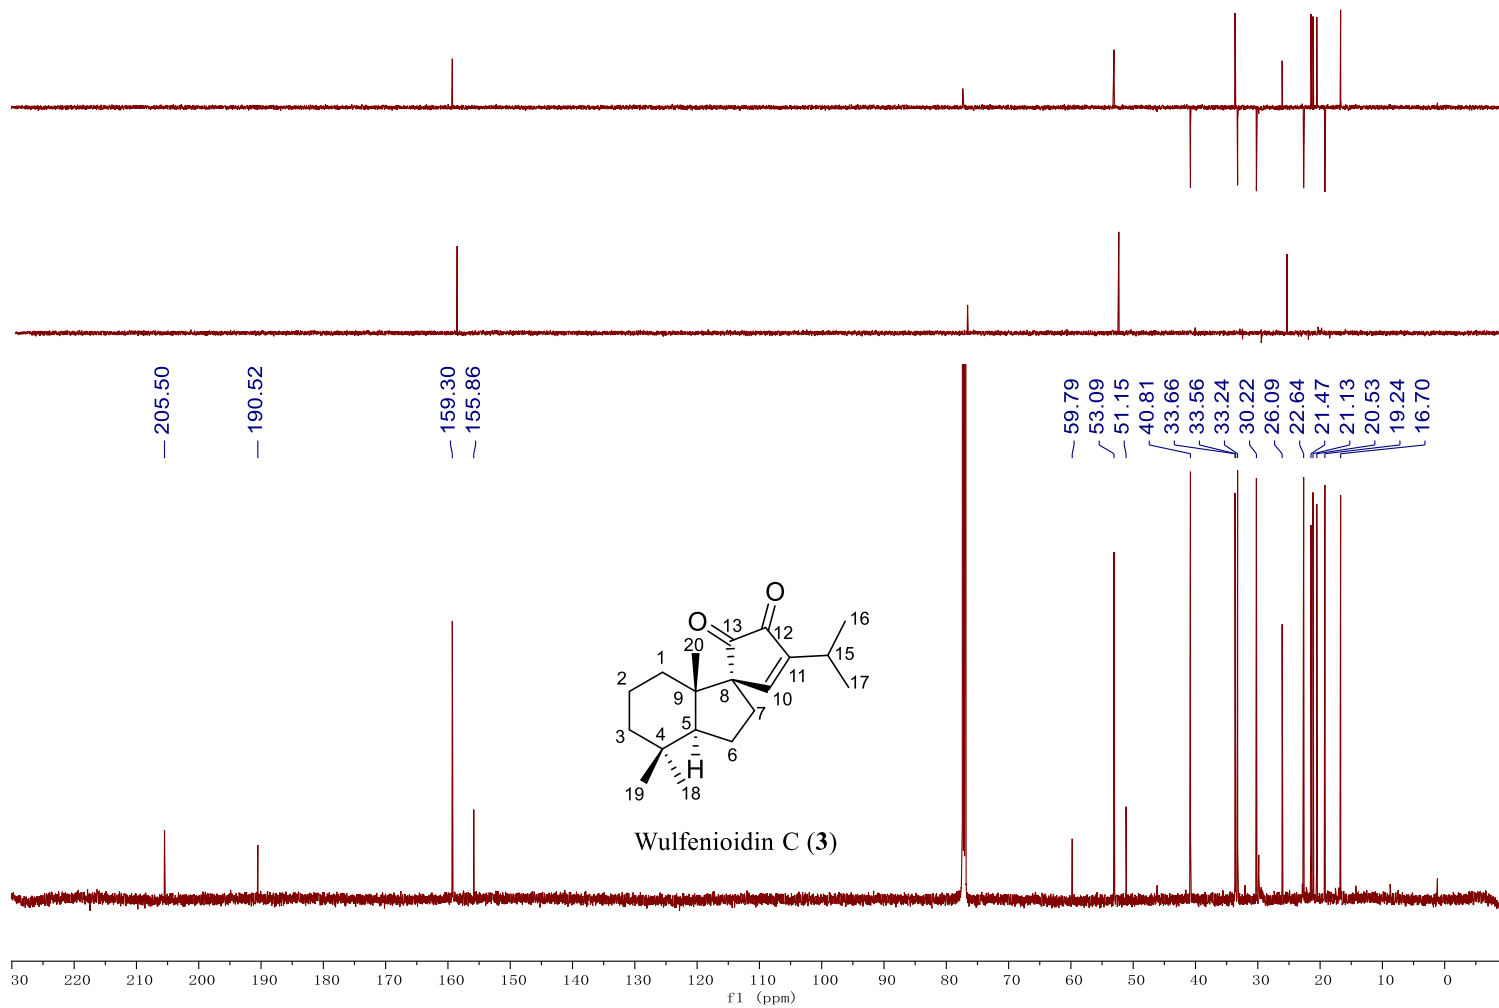

Figure S30.  $^{13}\text{C}$  and DEPT NMR spectra of wulfenioidin C (3) in chloroform (150 MHz)



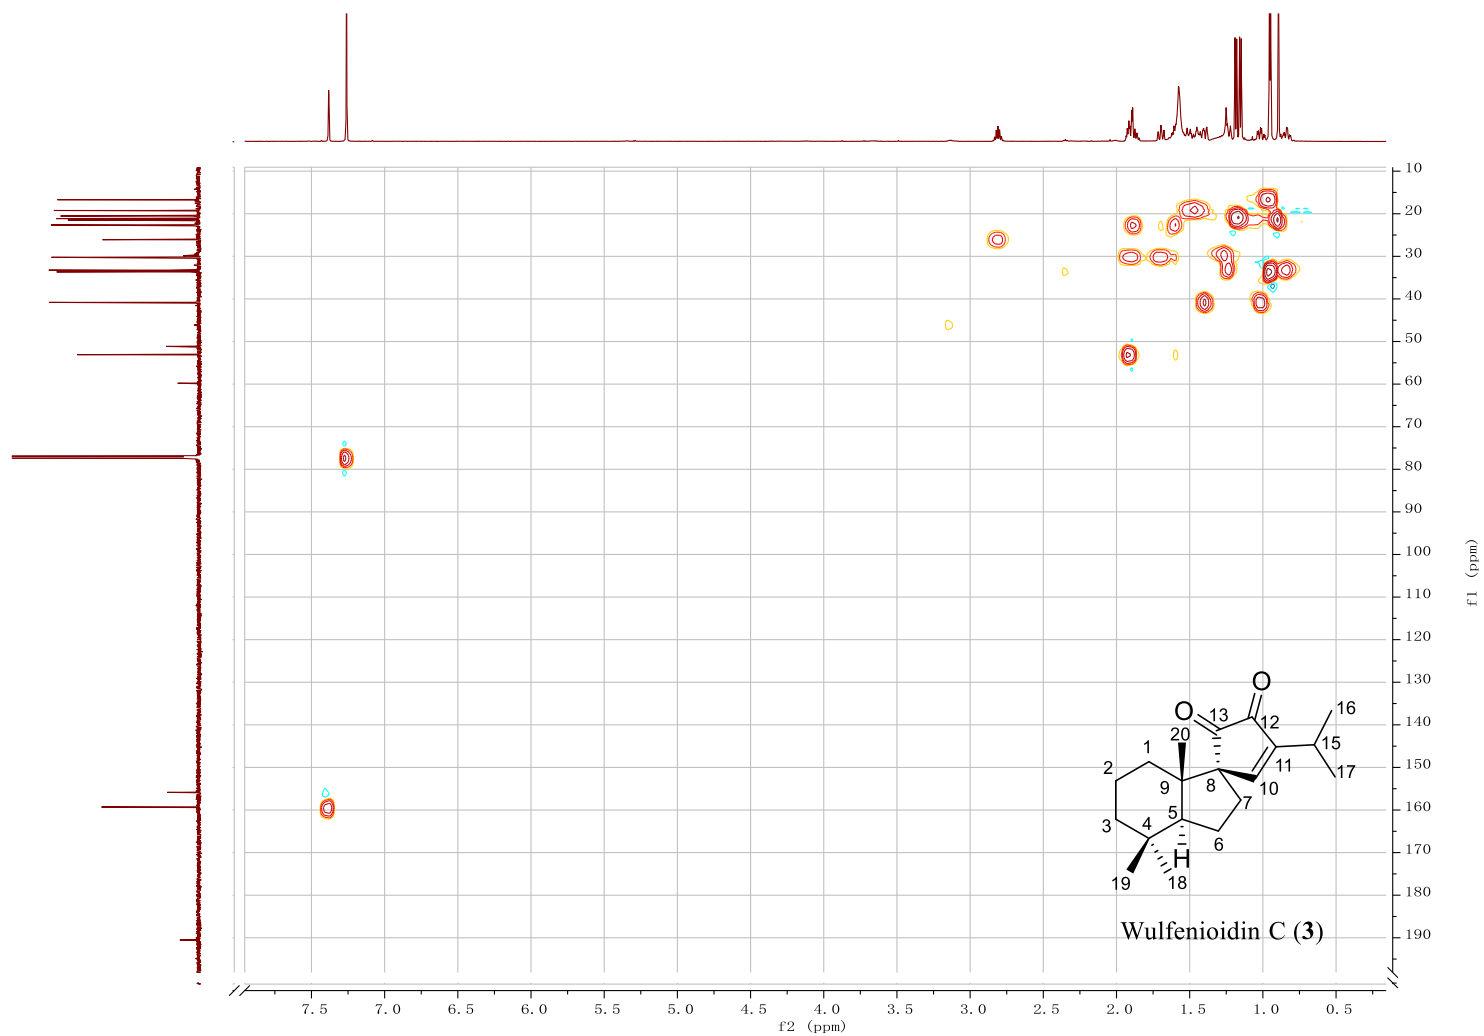

Figure S31. HSQC spectrum of wulfenioidin C (3) in chloroform (600 MHz)

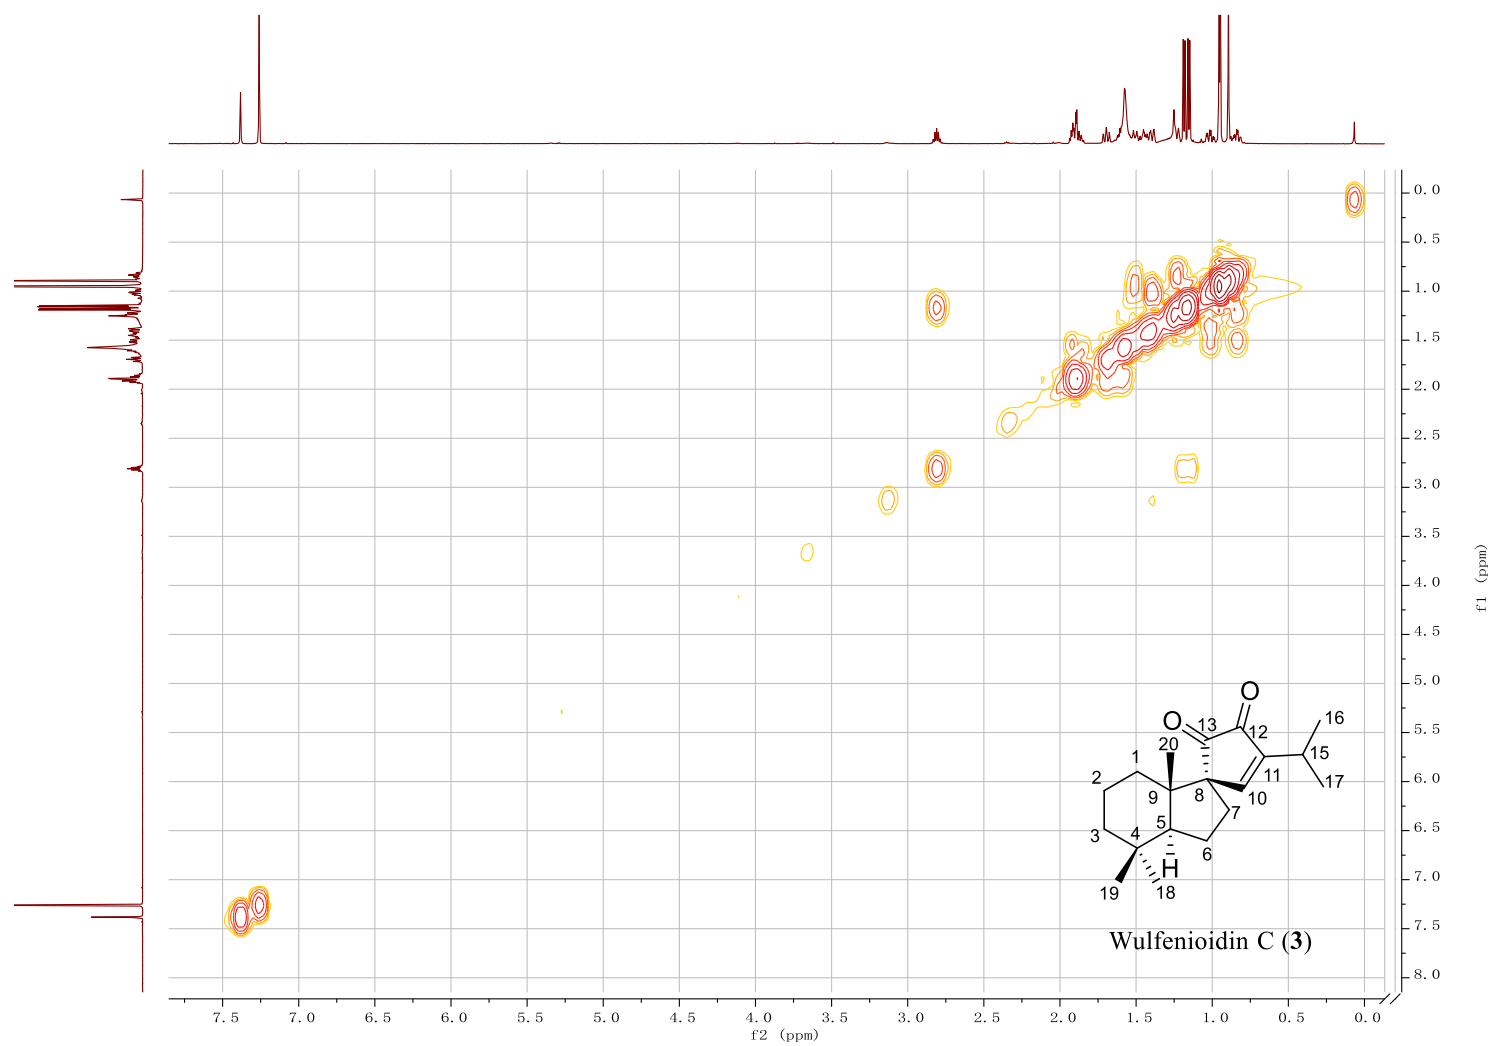

**Figure S32.**  $^1\text{H}$ - $^1\text{H}$  COSY spectrum of wulfenioidin C (**3**) in chloroform (600 MHz)

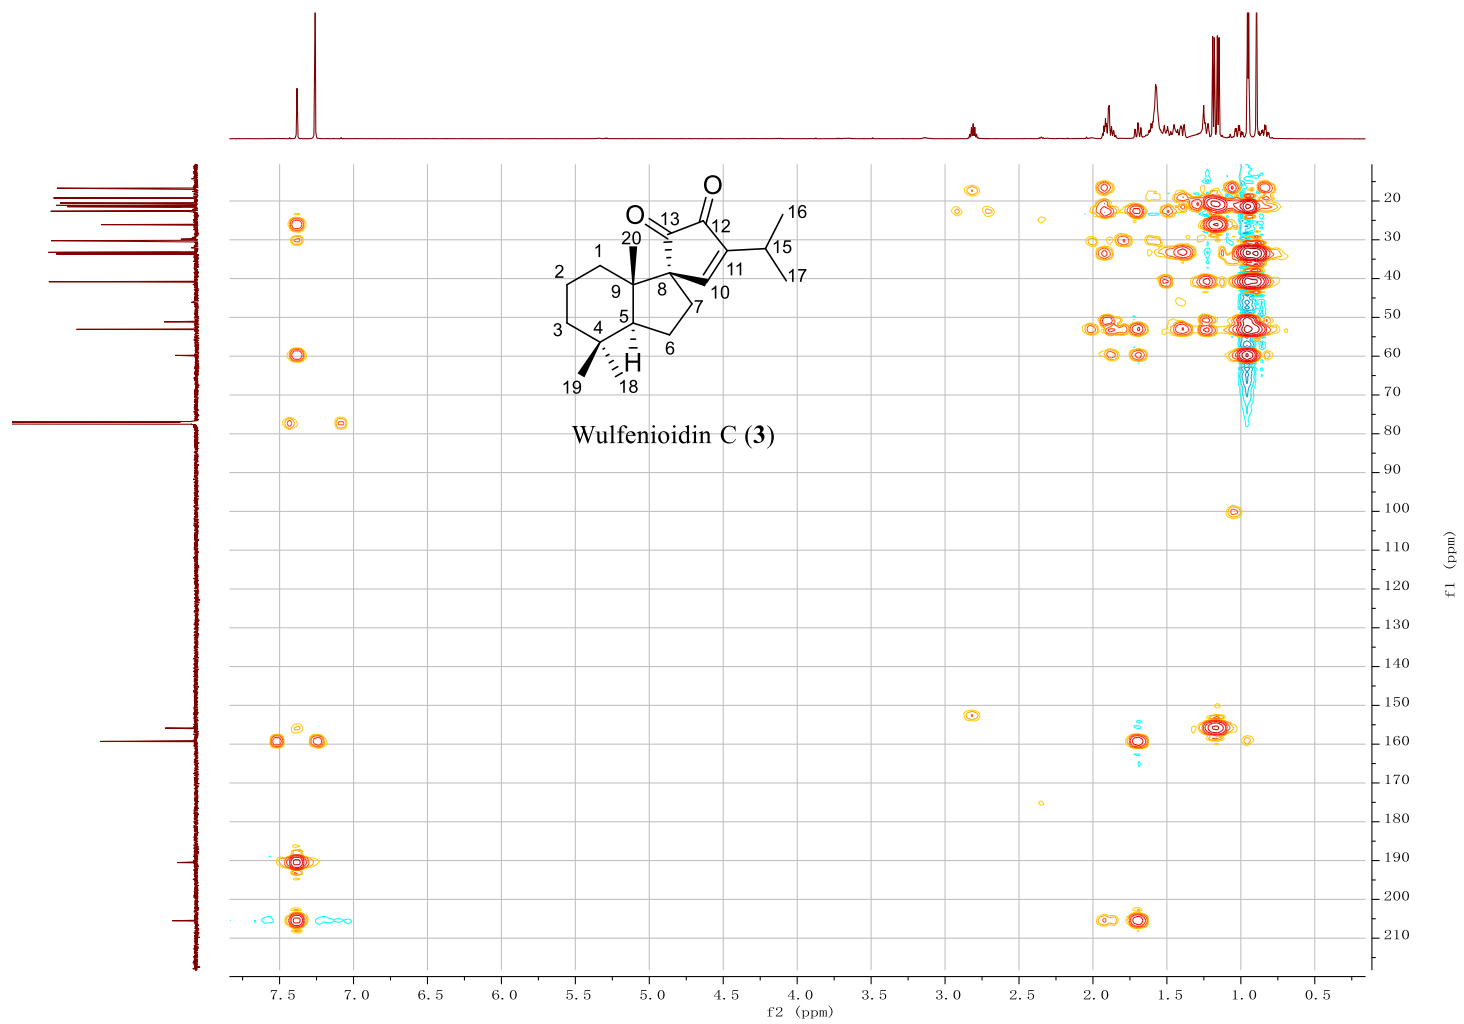

Figure S33. HMBC spectrum of wulfenioidin C (3) in chloroform (600 MHz)

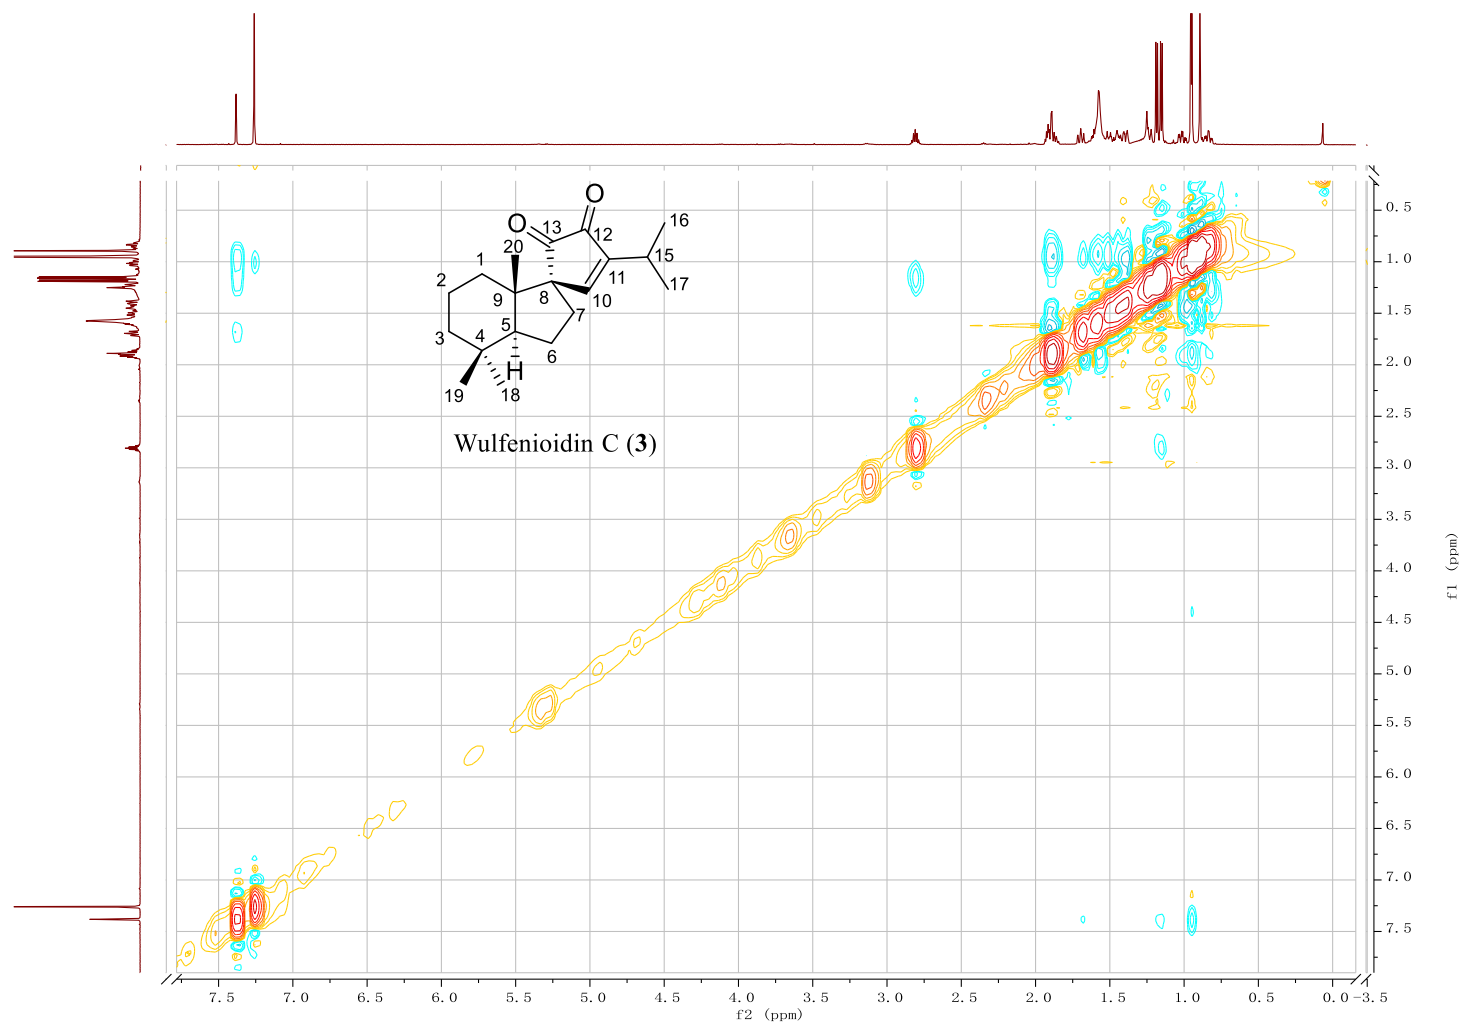

Figure S34. ROESY spectrum of wulfenioidin C (3) in chloroform (600 MHz)

| m/z      | Ion                | Formula                                        | Abundance |
|----------|--------------------|------------------------------------------------|-----------|
| 289.2167 | (M+H) <sup>+</sup> | C <sub>19</sub> H <sub>29</sub> O <sub>2</sub> | 460258.7  |

  

| Best                                | Formula (M)                                    | Ion Formula                                    | Score | Cross Score | Calc m/z | Diff (ppm) | Mass Match | Abund Match | Spacing Match |
|-------------------------------------|------------------------------------------------|------------------------------------------------|-------|-------------|----------|------------|------------|-------------|---------------|
| <input checked="" type="checkbox"/> | C <sub>19</sub> H <sub>28</sub> O <sub>2</sub> | C <sub>19</sub> H <sub>29</sub> O <sub>2</sub> | 98.98 |             | 289.2162 | -1.63      | 98.34      | 99.32       | 99.86         |

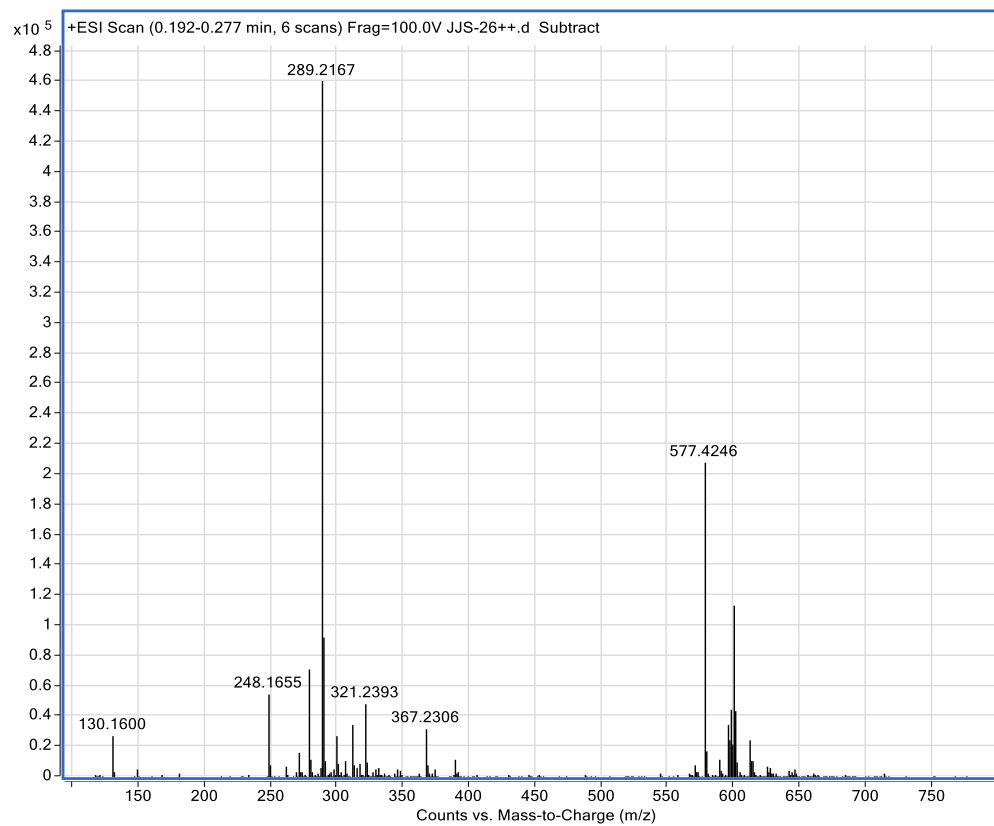

**Figure S35.** HRESIMS spectrum of wulfenioidin **C** (3)

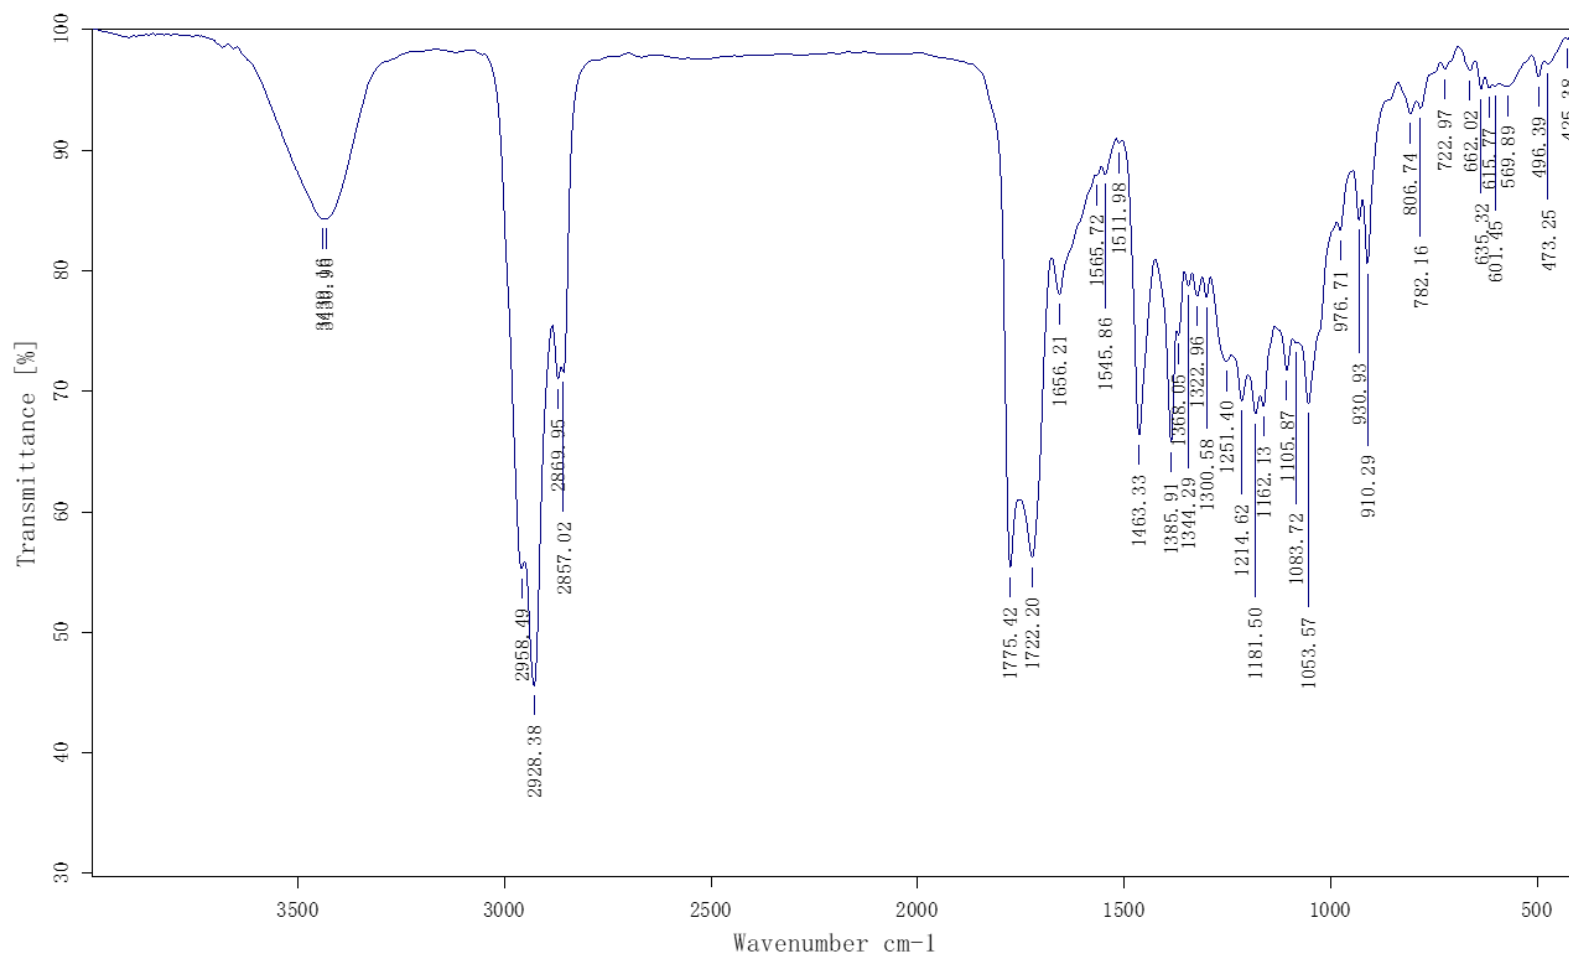

Figure S36. IR spectrum of wulfenioidin C (3)

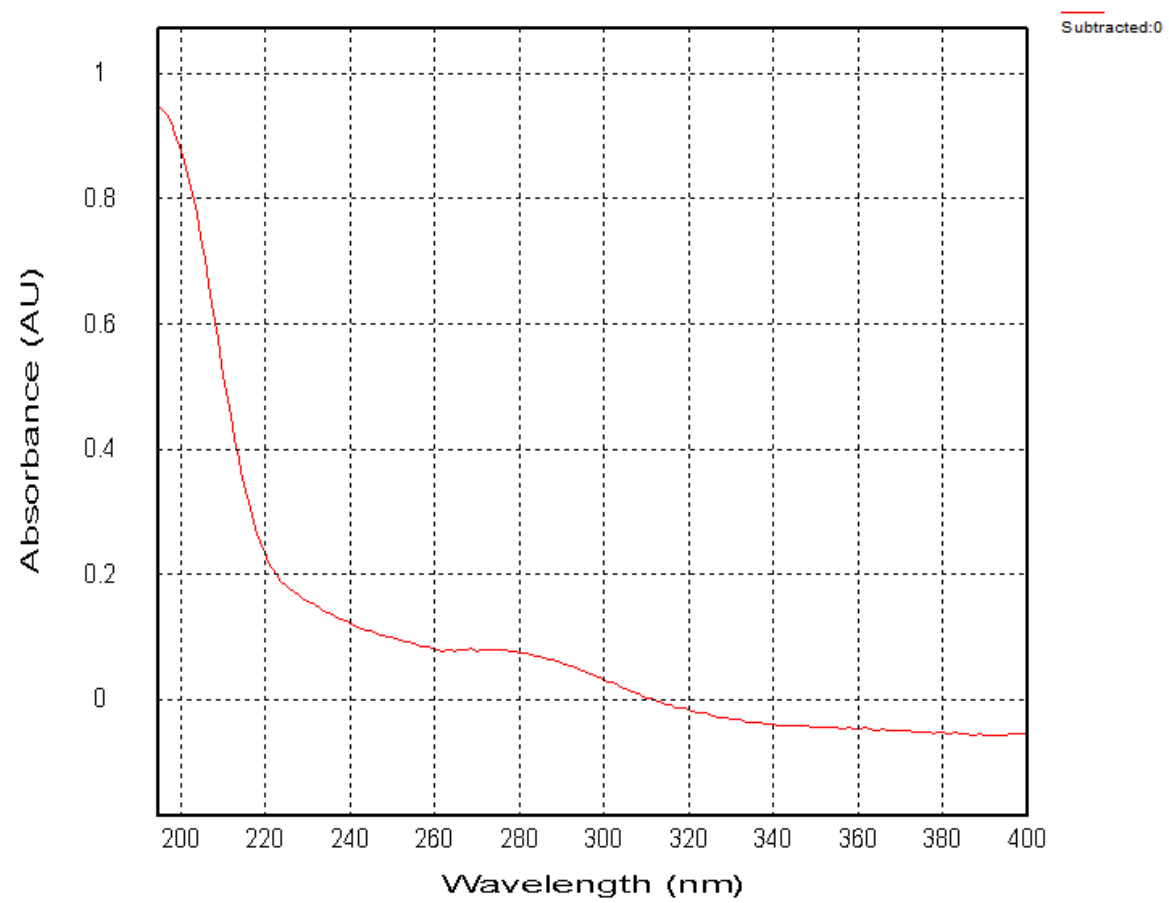

**Figure S37.** UV spectrum of wulfenioidin C (3)

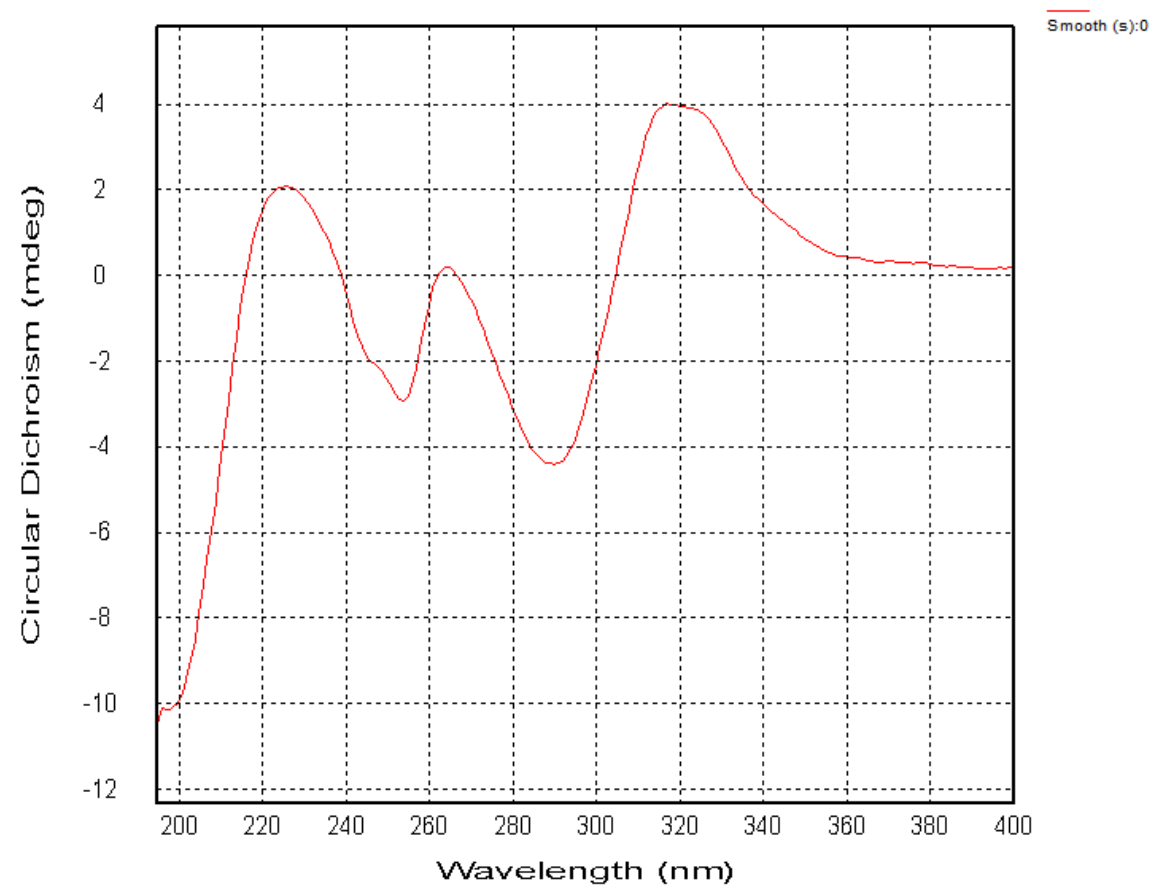

**Figure S38.** CD spectrum of wulfenioidin **C (3)**



## **Rudolph Research Analytical**

This sample was measured on an Autopol VI, Serial #91058  
Manufactured by Rudolph Research Analytical, Hackettstown, NJ, USA.

Measurement Date : Thursday, 24-FEB-2022

Set Temperature : 20.0

Time Delay : Disabled

Delay between Measurement : Disabled

| <b><u>n</u></b>    | <b><u>Average</u></b>   | <b><u>Std.Dev.</u></b> | <b><u>% RSD</u></b>  | <b><u>Maximum</u></b> | <b><u>Minimum</u></b> |                      |                     |                            |                     |  |
|--------------------|-------------------------|------------------------|----------------------|-----------------------|-----------------------|----------------------|---------------------|----------------------------|---------------------|--|
| 5                  | -87.20                  | 0.84                   | -0.96                | -86.00                | -88.00                |                      |                     |                            |                     |  |
| <b><u>S.No</u></b> | <b><u>Sample ID</u></b> | <b><u>Time</u></b>     | <b><u>Result</u></b> | <b><u>Scale</u></b>   | <b><u>OR °Arc</u></b> | <b><u>WLG.nm</u></b> | <b><u>Lq.mm</u></b> | <b><u>Conc.g/100ml</u></b> | <b><u>Temp.</u></b> |  |
| 1                  | JJS-26                  | 02:31:57 PM            | -87.00               | SR                    | -0.087                | 589                  | 100.00              | 0.100                      | 20.0                |  |
| 2                  | JJS-26                  | 02:32:03 PM            | -88.00               | SR                    | -0.088                | 589                  | 100.00              | 0.100                      | 20.0                |  |
| 3                  | JJS-26                  | 02:32:09 PM            | -88.00               | SR                    | -0.088                | 589                  | 100.00              | 0.100                      | 20.0                |  |
| 4                  | JJS-26                  | 02:32:16 PM            | -87.00               | SR                    | -0.087                | 589                  | 100.00              | 0.100                      | 20.0                |  |
| 5                  | JJS-26                  | 02:32:22 PM            | -86.00               | SR                    | -0.086                | 589                  | 100.00              | 0.100                      | 20.0                |  |

**Figure S39.** OR report of wulfenioidin C (3)

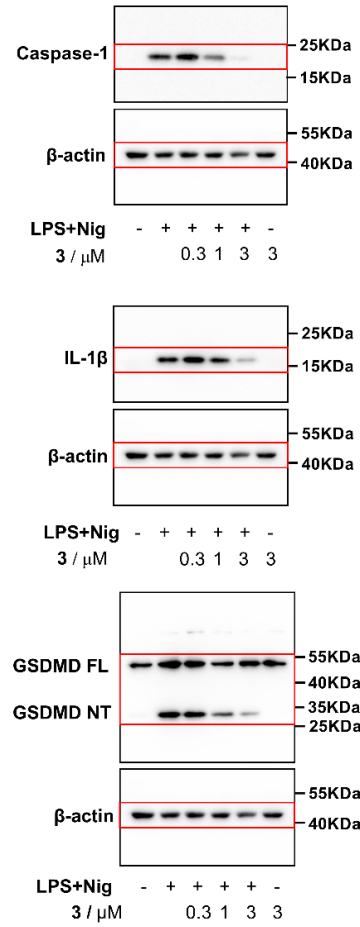

**Figure S40.** The full raw data of western blots (E, F, and G) of compound **3**
